1  
2  
3  
4  
5  
6  
7  
8  
9  
10  
11  
12  
13  
14  
15  
16  
17  
18  
19  
20  
21  
22  
23  
24

# *Pseudomonas aeruginosa* cytochrome P450 CYP168A1 is a fatty acid hydroxylase that metabolizes arachidonic acid to the vasodilator 19- HETE

*Brian C. Tooker<sup>†</sup>, Sylvie E. Kandel<sup>†</sup>, Hannah M. Work, and Jed N. Lampe\**

Department of Pharmaceutical Sciences, Skaggs School of Pharmacy, University of Colorado, Aurora,  
Colorado, 80045, United States.

<sup>†</sup>B.C. Tooker and S.E. Kandel contributed equally to this work and are therefore listed as co-first authors.

\*To whom correspondence should be addressed ([jed.lampe@cuanschutz.edu](mailto:jed.lampe@cuanschutz.edu)).

**RUNNING TITLE:** *P. aeruginosa* CYP168A1 is an arachidonic acid hydroxylase

**KEYWORDS:** *Pseudomonas aeruginosa*, pathogen, cytochrome P450, arachidonic acid hydroxylase,  
19-HETE, lipids, biofilms

25 **ABSTRACT**

26 *Pseudomonas aeruginosa* is a gram-negative opportunistic human pathogen that is highly  
27 prevalent in individuals with cystic fibrosis (CF). A major problem in treating CF patients infected with  
28 *P. aeruginosa* is the development of antibiotic resistance. Therefore, the identification of novel *P.*  
29 *aeruginosa* antibiotic drug targets is of the utmost urgency. The genome of *P. aeruginosa* contains four  
30 putative cytochrome P450 enzymes (CYPs) of unknown function that have never before been  
31 characterized. Analogous to some of the CYPs from *M. tuberculosis*, the *P. aeruginosa* CYPs may be  
32 important for growth and colonization of the CF patient's lung. In this study, we cloned, expressed, and  
33 characterized CYP168A1 from *P. aeruginosa* and identified it as a sub-terminal fatty acid hydroxylase.  
34 Spectral binding data and computational modeling of substrates and inhibitors suggest that CYP168A1  
35 has a large, expansive active site preferring long chain fatty acids and large hydrophobic inhibitors.  
36 Furthermore, metabolism experiments confirm that the enzyme is capable of hydroxylating arachidonic  
37 acid, an important inflammatory signaling molecule present in abundance in the CF lung, to 19-  
38 hydroxyeicosatetraenoic acid (19-HETE;  $K_m = 41.1 \mu\text{M}$ ,  $V_{max} = 222 \text{ pmol/min/nmol P450}$ ), a potent  
39 vasoconstrictor which may play a role in the pathogen's ability to colonize the mammalian lung.  
40 Metabolism of arachidonic acid is subject to substrate inhibition and is also inhibited by the presence of  
41 ketoconazole. This study points to the discovery of a new potential drug target that may be of utility in  
42 treating drug resistant *P. aeruginosa*.

## 43 INTRODUCTION

44 *Pseudomonas aeruginosa* is a gram-negative opportunistic pathogen that is highly prevalent in  
45 individuals with cystic fibrosis (CF), a debilitating inherited disease (1-3). In CF patients with reoccurring  
46 *P. aeruginosa* infections, the organism is known to form intractable biofilms that lead to antibiotic  
47 resistance (4-7). Antibiotic failure can result in pneumonia which can be life-threatening in the respiratory  
48 compromised CF patient (2,8). Moreover, chronic airway infection by *P. aeruginosa* significantly  
49 promotes lung tissue destruction, further compromising pulmonary function in individuals with CF.  
50 Given this, the need for characterization of new antibiotic targets and drugs that have the potential to  
51 inhibit biofilm formation in *P. aeruginosa* is urgently needed. The genome of *P. aeruginosa* strain PAO1  
52 (UW) was first completely sequenced in 1999 (9) and serves as a reference genome for the organism  
53 (<http://www.pseudomonas.com/>). The genome of *P. aeruginosa* contains four putative cytochrome P450  
54 (CYP) monooxygenase genes; designated CYP107S1, CYP168A1, CYP169A1, and CYP239A1(10). In  
55 bacteria, CYP enzymes are known to perform diverse functions, including: antibiotic synthesis (11-14),  
56 carbon source metabolism(15-17), detoxification(18,19), and secondary metabolite production(20-22).  
57 Cytochrome P450 enzymes from the closely related obligate intracellular pathogen *M. tuberculosis* have  
58 been characterized and determined to be integral to the metabolism of fatty acids(23-26),  
59 cholesterol(27,28) and even certain antibiotics(29,30), all of which promote bacterial survival and growth  
60 under a variety of conditions. While the exact functions of the CYP enzymes identified in *P. aeruginosa*  
61 remain unknown, they have recently been implicated in both detoxification(18) and the oxidation of  
62 environmental contaminants (31). Further evidence links them to the metabolism of medium to long chain  
63 alkanes(32), suggesting their role as fatty acid and/or alkane hydroxylases. Indeed, a number of bacterial  
64 CYP enzymes are known to function as fatty acid hydroxylases and this role for CYPs seems to be  
65 common among the eubacteria(10), although this particular function has yet to be demonstrated for the *P.*  
66 *aeruginosa* CYP enzymes.

67 Many types of fatty acids are found within the environment of the lung and could possibly serve  
68 as carbon sources for *P. aeruginosa* as it attempts to establish a colony(8). However, certain fatty acids,  
69 including arachidonic acid and its metabolites, control inflammation and immune cell recruitment to the  
70 site of infection(33-35). Moreover, concentrations of arachidonic acid are significantly increased in the  
71 CF patient lung due to a metabolic defect(36,37). An intriguing possibility is that the organism may be  
72 able to modify the immune response by oxidation of arachidonic acid and its metabolites, thereby making  
73 its local environment more hospitable for the parasite to grow and proliferate. Indeed, a secreted  
74 lipoxygenase from *P. aeruginosa*, designated LoxA, is capable of metabolizing arachidonic acid to 15-  
75 hydroxyeicosatetraenoic acid (15-HETE)(38), which has been demonstrated to down regulate the immune  
76 response *in vivo*(39), illustrating the capacity of *P. aeruginosa* to reduce the host's ability to respond to  
77 infection through the metabolism of inflammatory mediators. More recent work elucidated the role of a  
78 soluble epoxide hydrolase to specifically reduce levels of the host pro-resolving lipid mediator, 15-epi  
79 lipoxin A4 (15-epi LXA4), thereby contributing to the prolongation of pulmonary inflammation and  
80 associated loss of lung function in patients with CF(40,41). These studies raise the prospect that the  
81 modulation of anti-inflammatory lipid mediators may be a general strategy by which *P. aeruginosa*  
82 regulates the host-pathogen relationship to promote the colony establishment. Despite the evidence for  
83 the involvement of these bacterial enzymes in the regulation of inflammatory lipid mediators, the CYP  
84 enzymes of *P. aeruginosa* have never before been examined for their ability to metabolize physiologically  
85 important fatty acids, such as arachidonic acid and its derivatives.

86 Here, we report the characterization of the first CYP enzyme cloned from *P. aeruginosa*,  
87 CYP168A1(42). Our findings indicate that CYP168A1 is a fatty acid hydroxylase with a high affinity for  
88 long chain fatty acids, such as oleic and arachidonic acid. Additionally, CYP168A1 is capable of binding  
89 largeazole inhibitors, including ketoconazole and miconazole. These results, and *in silico* modeling of  
90 ligands docked to the enzyme, suggest an enzyme with a large, expansive active site. Furthermore, we  
91 have characterized the hydroxylation pattern of arachidonic acid and lauric acid, a model fatty acid,

92 establishing CYP168A1 as a medium to long chain fatty acid hydroxylase, attacking the carbon chain at  
93 the  $\omega$ -1 and  $\omega$ -2 positions. Moreover, it is capable of metabolizing arachidonic acid to 19-  
94 hydroxyeicosatetraenoic acid (19-HETE), a potent vasoconstrictor which may play an important role in  
95 the pathogen's ability to colonize the mammalian lung. These results lay the groundwork for  
96 understanding the function of the CYP168A1 enzyme in this important human pathogen and its potential  
97 as a drug target.

## 98 **RESULTS**

99 ***Expression and Characterization of CYP168A1.*** CYP168A1 is the first CYP enzyme from *P.*  
100 *aeruginosa* PAO1 to be cloned, expressed, purified, and characterized in a soluble recombinant form(42).  
101 The protein was isolated and purified to homogeneity (>90%), resulting in a single band present on the  
102 denatured SDS-PAGE gel with a relative molecular weight of ~48.5 kDa (Figure 1A). The purified  
103 protein exhibited a characteristic spectral absorption pattern for a heme containing protein, with a  $\lambda_{\text{max}}$  of  
104 417 nm for the oxidized protein and 420 nm for the sodium dithionite reduced species (Figure 1B).  
105 Reduction of the CYP168A1 heme iron by sodium dithionite followed by carbon monoxide (CO) binding  
106 shifted the Soret peak to ~450 nm, the signature of a cytochrome P450 enzyme (Figure 1C). The Soret  
107 peak at 450 nm grew with time, ultimately reaching a plateau and stabilizing after 20 min. Our initial  
108 expression experiment from 6 L of *E. coli* culture yielded a total of 315 nmoles of purified and soluble  
109 recombinant CYP168A1.

110 ***Ligand Binding to CYP168A1.*** In order to determine the chemical space occupied by ligands of  
111 CYP168A1, a series of spectral titrations were conducted with a variety of putative substrates and  
112 inhibitors, with selection criteria being based upon structural similarity to known cytochrome P450  
113 ligands. Initial experiments focused on a variety ofazole compounds, which are well known CYP  
114 inhibitors (Figure 2). Allazole ligands examined elicited a typical Type II red shift of the Soret band to  
115 ~421.5–440 nm (Figure 2, A-D insets), reflecting direct coordination of the free electron pair of theazole  
116 ring nitrogen to the heme iron(43). The maxima and minima of these binding spectral curves were used to

117 plot the binding isotherm and calculate the  $K_d$  values for each ligand (Table 1). The four azole drugs  
118 tested demonstrated tight binding affinities for CYP168A1 from high to low: ketoconazole ( $0.684 \pm 0.076$   
119  $\mu\text{M}$ ), miconazole ( $0.882 \pm 0.182 \mu\text{M}$ ), econazole ( $2.46 \pm 0.42 \mu\text{M}$ ), and clotrimazole ( $2.99 \pm 0.39$ )  
120 (Figure 2, Table 1). Notably, larger azoles exhibited a higher binding affinity (lower  $K_d$ ) than their  
121 corresponding smaller ligand counterparts, with the largest ligand – ketoconazole – having a sub-  
122 micromolar  $K_d$  (Table 1). In contrast, binding of various fatty acids to the CYP168A1 ferric heme iron  
123 caused a characteristic Type I shift of the Soret band to 380-392 nm, reflecting displacement of the heme  
124 distal water at the sixth ligand to the heme iron and indicative of a substrate binding in the active site  
125 (Figure 3A-G insets). As done with the Type II azole ligands, the maxima and minima of these binding  
126 spectral curves were used to calculate the  $K_d$  values for each fatty acid examined (Figure 3, Table 1).  
127 Consistent with our observations of larger azoles binding to the enzyme, higher molecular weight long-  
128 chain fatty acids were preferred over their short chain counterparts, with the highest affinity ligands being  
129 palmitic ( $0.207 \pm 0.038 \mu\text{M}$ ), stearic ( $0.327 \pm 0.072 \mu\text{M}$ ), and oleic ( $0.374 \pm 0.065 \mu\text{M}$ ) acids (Figure 3,  
130 Table 1). Interestingly, while exhibiting a preference for longer chain hydrocarbons, CYP168A1 seemed  
131 to bind both monounsaturated and polyunsaturated fatty acids with similar, sub-micromolar affinities  
132 (Table 1). The Type I difference spectra and tight (sub-micromolar, in most cases) binding affinities  
133 suggested that fatty acid ligands of chain length C10 or greater had the potential to be substrates of  
134 CYP168A1. Ligand binding was also assessed for steroids (e.g., cholesterol, etc.) and certain drugs (e.g.,  
135 raloxifene, ciprofloxacin), but no spectral changes in the Soret bands were observed during the titrations.

136 ***Lauric Acid Metabolism by CYP168A1.*** The reductase electron transfer partners of CYP168A1  
137 are currently unknown. Therefore, in order to determine if CYP168A1 was able to catalyze the oxidation  
138 of the model substrate lauric acid, initial experiments were conducted using either a series of  
139 hydroperoxide compounds as oxygen surrogates and electron donors or a spinach-derived redox partner  
140 complex consisting of the spinach ferredoxin (Fdx) and ferredoxin reductase (FdR). The spinach Fdx and  
141 FdR redox partners were previously shown to function as effective electron transfer surrogates to promote

142 oxidation of substrates by the bacterial CYPs CYP125A1(44) and CYP141(30), structurally related CYP  
143 enzymes from *M. tuberculosis*. Gas chromatography-mass spectrometry (GC-MS) experiments confirmed  
144 that the major metabolite produced was the 11-hydroxylauric acid (Figure 4). The mass spectrum of the  
145 trimethylsilyl-derivatized lauric acid metabolite formed in CYP168A1 incubations with the spinach redox  
146 partners (Figure 4B) matched the fragmentation pattern of the derivatized 11-hydroxylauric acid standard  
147 (Figure 4A). In addition, the  $m/z$  fragment of 117, corresponding to the  $(\text{CH}_3)_3\text{SiO}(\text{CH}_2\text{-CH}_3)$  ion, is a  
148 characteristic fragment of an  $\omega$ -1 hydroxyl fatty acid derivative(45). Next, liquid chromatography-mass  
149 spectrometry (LC-MS) experiments were employed to quantify formation of the 11-hydroxylauric acid  
150 metabolite with the hydroperoxide compounds or the spinach redox partners. The 11- and 12-  
151 hydroxylauric acid standards were baseline separated (Figure 5). The LC-MS trace for the lauric acid  
152 incubation of CYP168A1 with the spinach redox partners and the cofactor nicotinamide adenine  
153 dinucleotide phosphate (NADPH) shows the 11-hydroxylauric acid as the major metabolite formed and  
154 presence of a minor hydroxyl metabolite matching the retention time of the 12-hydroxylauric acid,  
155 although the identity of the minor metabolite could not be confirmed by GC-MS due to its low  
156 abundance.

157 ***Hydroperoxide-Driven Catalysis by CYP168A1.*** A concentration range of the tert-butyl (tBPH)  
158 and cumene hydroperoxides (CuOOH) were tested for catalysis of lauric acid hydroxylation by  
159 CYP168A1 and formation of the 11-hydroxyl derivative. As can be observed in Figure 6, maximal  
160 metabolite formation occurred following incubations of 1  $\mu\text{M}$  CYP168A1 with 10  $\mu\text{M}$  lauric acid for 120  
161 min with the hydroperoxides. The results demonstrate that CYP168A1 was able to hydroxylate lauric acid  
162 utilizing the peroxide shunt pathway, bypassing the catalytic cycle necessary for transferring electrons  
163 from NAD(P)H through a cytochrome P450 reductase(46). Maximal lauric acid metabolism was achieved  
164 when the concentration of each hydroperoxide was 0.25 mM. However, metabolism was uniquely altered  
165 for each hydroperoxide in a concentration-dependent manner.

166 ***Redox Partner-Driven Catalysis by CYP168A1.*** In order to investigate ligand metabolism  
167 requiring the transfer of electrons along the full P450 catalytic cycle, surrogates for the bacterial  
168 reductases were employed. We used the spinach Fdx and FdR as redox partners in the following  
169 experiments. The effects of varying Fdx and FdR concentrations were assessed in order to determine the  
170 optimal CYP:redox partner ratio (Figure 7). When increasing Fdx concentrations, formation of the 11-  
171 hydroxyl metabolite was maximum at the 1/20 CYP:Fdx ratio (Figure 7A). In contrast, when increasing  
172 FdR concentrations, formation of the 11-hydroxylauric acid reached plateau at 0.2 U/mL of FdR (Figure  
173 7B). The optimal ratio of CYP:Fdx:FdR was determined to be 1  $\mu$ M:20  $\mu$ M:0.2 U/mL for maximal  
174 CYP168A1 lauric acid hydroxylation activity. However, under the 1/20 CYP:Fdx ratio conditions and the  
175 0.2 U/mL FdR, metabolism of lauric acid exceeded the 20% substrate consumption leading to non-linear  
176 enzyme kinetics. Thus, to allow for further assessment of CYP168A1 lauric acid hydroxylation kinetics  
177 under appropriate steady state conditions, we set the final CYP:Fdx:FdR ratio at 1  $\mu$ M:10  $\mu$ M:0.05 U/mL.

178 ***Kinetics of Lauric Acid  $\omega$ -1-Hydroxylation by CYP168A1.*** To further elucidate the kinetic  
179 mechanism of lauric acid oxidation by CYP168A1, steady-state kinetic experiments were performed  
180 using the optimized reaction conditions described above. Due to the sigmoidal nature of the data (Figure  
181 8), both the Michaelis-Menten and Hill fits were compared using the Akaike Information Criterion (AIC)  
182 (47). The difference of the second order Aikake Information Criterion (AICc) is representative of the  
183 difference between the simpler model (Michaelis-Menten) minus the alternative model (Hill), which  
184 includes more fitting parameters. The difference in AICc for lauric acid  $\omega$ -1-hydroxylation by CYP168A1  
185 was determined as 16.85 (Table 2). A positive number for the difference of AICc means that the  
186 alternative model (with more parameters) has the lower AICc and is preferred. Thus, the Hill model was  
187 judged to yield a better fit for the lauric acid kinetic data set with a correct fit probability of 99.98%  
188 (Table 2). According to the Hill equation, CYP168A1 has an  $S_{50}$  of  $33.7 \pm 2.2$   $\mu$ M, a  $V_{max}$  of  $0.118 \pm$   
189  $0.004$  nmol/min/nmol P450 and an  $n$  value, a measurement of the cooperativity of substrate binding, of



190 1.46 (Figure 8, Table 2). An  $n$  value above 1 is indicative of positive cooperativity in substrate  
191 binding(48).

192 ***Arachidonic Acid Metabolism by CYP168A1.*** The low  $K_d$  measured for the longer unsaturated  
193 fatty acids drove our investigation towards characterizing the potential for arachidonic acid metabolism  
194 by CYP168A1. The CYP:redox partner ratio previously optimized for lauric acid kinetic experiments was  
195 initially used for linearity assessment of the arachidonic acid metabolism. LC-MS experiments were  
196 carried out with arachidonic acid and CYP168A1 where two major hydroxyl metabolites were identified,  
197 the 18-hydroxyeicosatetraenoic acid (18-HETE) and the 19-HETE (Figure 9A). Formation of the 20-  
198 hydroxyeicosatetraenoic acid (20-HETE) metabolite was also detected, but at too low level to allow  
199 quantification (Figure 9A). The MSMS spectra of the 18- (Figure 9C) and 19-HETE (Figure 9B) formed  
200 in CYP168A1 arachidonic acid incubations matched the MSMS spectra of the corresponding authentic  
201 standards. Quantification of the 18-HETE and 19-HETE formed over time with CYP168A1 (data not  
202 shown) highlighted the requirement in optimizing the concentrations of the CYP168A1 enzyme and the  
203 spinach redox partners in the arachidonic acid incubations to achieve steady state conditions. Effectively,  
204 the CYP:Fdx:FdR ratio had to be adjusted to 0.5  $\mu\text{M}$ :5  $\mu\text{M}$ :0.025 U/mL to achieve linearity in product  
205 formation up to 20 min (data not shown). Concurrently to our linearity assessment, we tested the effect of  
206 theazole ligand ketoconazole on the 18- and 19-HETE metabolite formation (Figure 10). In presence of  
207 10  $\mu\text{M}$  ketoconazole, CYP168A1 formation of 18- and 19-HETE was inhibited to 67.6% (Figure 10A)  
208 and 62.7% (Figure 10B), respectively, compared to the solvent control.

209 ***Kinetics of Arachidonic Acid  $\omega$ -1- and  $\omega$ -2-Hydroxylation by CYP168A1.*** To explore the kinetic  
210 mechanisms driving the arachidonic acid hydroxylation by CYP168A1, steady state kinetic experiments  
211 were performed using the optimized CYP:redox partner ratio described above for arachidonic acid.  
212 Unexpectedly, the 18- and 19-HETE formation rates measured over a range of arachidonic acid  
213 concentrations displayed substrate inhibition kinetics (Figure 11). According to the substrate inhibition  
214 model fit of the 18- and 19-HETE formation rate data, CYP168A1 exhibits a  $K_m$  of  $36.3 \pm 17.9 \mu\text{M}$ ,  $V_{max}$

215 of  $81.7 \pm 32.6$  pmol/min/nmol P450, and  $K_i$  of  $13.4 \pm 8.1$   $\mu$ M for 18-HETE formation, and a  $K_m$  of  $41.1 \pm$   
216  $24.6$   $\mu$ M,  $V_{max}$  of  $222 \pm 110$  pmol/min/nmol P450, and  $K_i$  of  $15.8 \pm 7.9$   $\mu$ M for 19-HETE formation.

217 ***CYP168A1 Homology Model.*** In an effort to explore the structural basis of fatty acid  
218 hydroxylation of CYP168A1, we built a homology model based on CYP VdH, a vitamin D3  
219 (cholecalciferol) hydroxylase from *P. autotrophica*(49) using USCF MODELLER(50) (Figure 12A). The  
220 model demonstrated a high-quality alignment with a zDOPE score of -1.08 and a GA341 score of 1. The  
221 PyMol castp plugin calculated an active site volume of  $668.6 \text{ \AA}^3$  with an area of  $569 \text{ \AA}^2$  (Figure 12B). As  
222 observed in other CYP enzyme structures, there is the critical active site threonine (T300), which plays a  
223 role in oxygen activation, present in the long I-helix over the heme iron. Overall, the structure is relatively  
224 compact, reminiscent of other bacterial CYP enzyme structures (23,51). Interestingly, the structure  
225 contains an abundance of aromatic residues, including 20 Phe, 8 Trp, and 8 Tyr (Figure 12C). A number  
226 of the Phe residues appear to be participating in pi-pi stacking interactions, which may contribute to the  
227 relative stability observed with the protein, as this has also been seen with some thermostable bacterial  
228 CYP enzymes(52).

229 ***Docking of Substrates and the Inhibitor Ketoconazole to CYP168A1.*** To increase our structural  
230 understanding of how ligands interact with the enzyme, both substrates (lauric acid and arachidonic acid)  
231 and an inhibitor (ketoconazole) were docked to the protein using AutoDock Vina(53). The most  
232 thermodynamically stable structure with the docked inhibitor, ketoconazole, with a  $\Delta G$  of -8.0 kcal/mol,  
233 found it present in the active site in a canonical pose with the nitrogen of the azole ring  $1.81 \text{ \AA}$  from the  
234 heme iron (Figure 12D). The binding pose is similar to the CYP3A4-ketoconazole structure, with the  
235 bulk of the molecule in an extended conformation across the active site, making numerous contacts with  
236 hydrophobic residues that line the substrate access channel, including (M292, V343, V445, and V357),  
237 which likely help anchor it in a high-affinity inhibitory conformation. While the favored pose for the  
238 model substrate lauric acid found it in the active site in close proximity with many of the same  
239 hydrophobic residues (including M292, A296, V343, V445, and V357), the carbon backbone of the

240 ligand was kinked at C7, allowing the molecule to bend and place C11 within  $\sim 5$  Å of the heme iron (5.02  
241 Å) (Figure 12E). Additional hydrophobic contacts occur with F118, L138, and G346. However, unlike  
242 ketoconazole, we also observed contacts with important hydrophilic residues, including the catalytic  
243 threonine (T300) and S444, an active site serine residue that has a homology in CYP3A4 and is critical  
244 for oxidative activity against a number of substrates, including testosterone(54), carbamazepine(55), and  
245 diazepam(56). The most stable binding pose of lauric acid within the CYP168A1 active site returned a  
246 binding energy of  $\Delta G$  of -5.7 kcal/mol. In contrast, the thermodynamically stable binding conformation of  
247 arachidonic acid found the molecule in a perpendicular orientation to the heme iron, with the carboxyl  
248 moiety extended toward the surface of the enzyme and a kink occurring at C15, positioning C18, C19,  
249 and C20 all close to the heme iron (4.719 Å, 5.083, 5.084, respectively) (Figure 12F). The binding energy  
250 of the arachidonic acid docked structure was -7.2 kcal/mol, closer to that observed with the inhibitor  
251 ketoconazole. All of the same hydrophobic contacts observed with both ketoconazole and lauric acid were  
252 also present in the arachidonic acid structure (i.e., F118, L138, V343, G346, M292, V343). However, its  
253 larger size permitted additional contacts with residues Q80, L227, A228, M295, and A296. Again, as  
254 observed with the lauric acid structure, there was interaction between the substrate and the catalytic  
255 threonine (T300).

## 256 **DISCUSSION**

257 CYP168A1 is the first cytochrome P450 enzyme from *P. aeruginosa* to be cloned, expressed, and  
258 characterized in a heterologous host (42). The genome of *P. aeruginosa* contains four putative CYP  
259 enzymes of unknown function (10). CYP168A1 is the largest of these four putative CYP enzymes at 444  
260 amino acids in length, significantly larger than the other three CYPs, particularly given that CYP239A1,  
261 at 386 amino acids in length, has been postulated to be a pseudogene (10).

262 Cytochrome P450 enzymes perform a wide variety of functions in bacteria (51), from secondary  
263 metabolite production (20-22) to carbon source metabolism (15-17), to synthesis of lipids critical for cell  
264 wall integrity (51,57). In some cases, these functions are essential to microbial growth (44); therefore, it

265 has been suggested that CYP enzymes may be useful targets for novel antibiotic therapies, particularly for  
266 pathogens that are intractable to current treatments (58,59). *P. aeruginosa* is a gram-negative  
267 opportunistic pathogen that is particularly prevalent in the lungs of patients with cystic fibrosis, chronic  
268 obstructive pulmonary disease, and nosocomial pneumonia (60-62). In patients with compromised lung  
269 and/or immune functions, recurrent infections are common (63,64). Successive rounds of antibiotic  
270 treatment can then lead to resistance, often mediated by the development of biofilms that make it almost  
271 impossible to eradicate the organism from the patient's lung (6,65). Prior studies have demonstrated that  
272 exposure to quinolones and carbapenems, antibiotics commonly used in ICUs, is linked to the  
273 development of multidrug-resistant *P. aeruginosa* (66), reducing the therapeutic options available to the  
274 clinician and increasing hospital mortality rates. Given this, it is critically important to identify new drug  
275 targets to provide effective treatment for these patients.

276 The UV-visible spectral data obtained from CYP168A1 are consistent with a cytochrome P450  
277 enzyme that is primarily composed of holoprotein, with little P420 species present, indicating that the  
278 protein was likely to be active (Figure 1). Initially, in order to determine the variety of ligand chemical  
279 space that might be accessible to CYP168A1, we examined several azole drugs, which are known CYP  
280 inhibitors (Figure 2) (67). For all the azole drugs tested, a Type II difference spectrum was observed,  
281 indicative of inhibitors that bind through coordination of the azole nitrogen free electron pair with the  
282 heme iron (68). Interestingly, larger ligands displayed higher affinity with the largest azole tested,  
283 ketoconazole, having the highest affinity ( $0.684 \pm 0.076 \mu\text{M}$ ; Table 1). These results are consistent with a  
284 rather large and expansive active site, similar to the human CYP3A enzymes (69), that is able to  
285 accommodate large, bulky hydrophobic ligands (Figure 12D). Additionally, it points to a strategy for  
286 inhibition of the enzyme through a specific azole functionality.

287 The most closely related CYP enzymes to CYP168A1 that have been thoroughly characterized  
288 are from the pathogen *M. tuberculosis* (23,27,67,70). Previous studies have demonstrated that, in the case  
289 of this obligate pathogen, CYP121A1 (71,72), CYP125A1 (44,73), and CYP142A1(74) are essential for

290 bacterial survival, making them attractive drug targets (58,75). CYP125A1 and CYP142A1 from *M.*  
291 *tuberculosis* have been identified as cholesterol hydroxylases, suggesting that at least some CYP enzymes  
292 from pathogens have evolved functions as steroid or fatty acid hydroxylases, which are common  
293 functions for a number of microbial CYP enzymes (76,77). This knowledge underlined our strategy for  
294 identifying possible substrates of CYP168A1 in order to determine its function.

295         Initially, we examined saturated fatty acids with chain lengths of 6 to 18 carbons (Figure 3; Table  
296 1). As can be observed from the results presented in Figure 3, all fatty acid ligands elicited a Type I  
297 difference spectrum indicative of substrate binding, except for those of length C-8 or shorter, where no  
298 spectral perturbations were visible. Similar to the trend observed with the azole compounds, CYP168A1  
299 showed a clear preference for longer chain fatty acids, as determined by their  $K_d$ , with an optimal length  
300 of approximately 16 carbons (Table 1). This suggests a large, or at least deep, hydrophobic active site that  
301 can accommodate endogenous long-chain fatty acid substrates that may be present in the host  
302 environment (8). Indeed, CYP168A1's active site volume is quite comparable to the active site volume of  
303 CYP3A4 (520 Å<sup>3</sup>) (78) and CYPBM3 (400 Å<sup>3</sup>) (79) (Figure 12B).

304         Furthermore, CYP168A1 tightly bound both the monounsaturated fatty acid oleic acid ( $0.374 \pm$   
305  $0.065 \mu\text{M}$ ) and the polyunsaturated fatty acid, arachidonic acid ( $0.960 \pm 0.074 \mu\text{M}$ ), suggesting that both  
306 saturated and unsaturated fatty acids could serve as substrates for CYP168A1. Interestingly, some  
307 common drugs (e.g., ciprofloxacin and raloxifene) did not exert any changes in the heme Soret spectrum,  
308 nor did the steroid cholesterol. This implies that CYP168A1 may have a narrower substrate specificity,  
309 limited to fatty acids or similar structurally related molecules.

310         To determine if fatty acids could indeed be oxidized by CYP168A1, we initially examined  
311 catalysis of the model fatty acid substrate, lauric acid, using either the oxygen surrogates of tert-butyl and  
312 cumene hydroperoxides or the spinach redox partners. While CYP enzymes are readily identifiable in  
313 various bacterial genomes through their unique sequences, such as the FxxGxxxCxG heme motif  
314 (10,80,81), it remains a challenge to identify their active redox partners, a ferredoxin and ferredoxin

315 reductase for a typical Type I system (68). Hence, spinach ferredoxin (Fdx) and ferredoxin reductase  
316 (FdR) have been employed as an electron delivery system in order to catalyze substrate oxidation for  
317 various bacterial CYP enzymes (30,44). Our initial GC-MS (Figure 4) and LC-MS (Figure 5) experiments  
318 with the spinach redox partners confirmed the 11-hydroxylauric acid as the primary lauric acid metabolite  
319 formed, validating the identity of CYP168A1 as a sub-terminal fatty acid hydroxylase. In addition,  
320 according to our LC-MS analysis, a small proportion (<5%) of lauric acid was metabolized to the  $\omega$ -  
321 hydroxyl derivative (Figure 5A). It is interesting to note that our docking studies determined that lauric  
322 acid was present in the active site in a somewhat unusual sterically strained conformation (Figure 12D),  
323 which may help explain why CYP168A1 primarily performs the  $\omega$ -1 oxidation over the  $\omega$ . After  
324 confirming lauric acid metabolite identity, we further examined the tert-butyl (tBHP) and cumene  
325 hydroperoxide (CuOOH) concentration-dependency to produce the 11-hydroxylauric acid. Both peroxide  
326 compounds equivalently stimulated catalysis of lauric acid with the optimal concentration for each  
327 peroxide used being 0.25 mM (Figure 6), a value similar to what has been determined for other CYP  
328 enzymes exploiting the peroxide shunt pathway (46). We then sought to identify the optimal ratio of the  
329 spinach Fdx and FdR redox partners based on the hydroxylation of lauric acid to 11-hydroxylauric acid  
330 (Figure 7). While the effect of Fdx concentration on the rate of 11-hydroxylauric acid was not saturable in  
331 our system (Figure 7A), the concentration of FdR achieved maximal formation of metabolite at a  
332 concentration of 0.2 U/mL, indicating that FdR was the rate limiting reactant (Figure 7B). After adjusting  
333 the ratio of redox partners to CYP enzyme to maintain steady state conditions, we conducted a complete  
334 kinetic characterization of the lauric acid substrate oxidation by CYP168A1, including determining both  
335 the  $K_m$  and  $V_{max}$  values for hydroxylation to the 11-hydroxylauric acid product (Figure 8). Somewhat  
336 surprisingly, the data best fit to the Hill equation, with a  $n$  value of 1.46,  $S_{50}$  of  $33.7 \pm 2.2 \mu\text{M}$ , and a  $V_{max}$   
337 of  $0.118 \pm 0.004 \text{ nmol/min/nmol P450}$ , suggesting a degree of cooperativity in the oxidation of lauric  
338 acid. It is not unusual for CYP enzymes to exhibit cooperativity in substrate oxidation, as this has been  
339 observed with a number of bacterial (13,82,83) and mammalian (84-86) enzymes. However, this may be

340 the first report of cooperative oxidation of a substrate by a CYP enzyme from a known human pathogen.  
341 While the oxidation of lauric acid defines CYP168A1 as a fatty acid hydroxylase, lauric acid is primarily  
342 a model substrate with no specific biological activity. In contrast, arachidonic acid, a tight binding ligand  
343 of CYP168A1 ( $K_d=0.960 \mu\text{M}$ ), is a well-known lipid second messenger involved in the response of cell  
344 signaling enzymes and, importantly for *P. aeruginosa* infection, a key regulator of inflammation (87).  
345 CYP168A1 metabolized arachidonic acid to predominantly the  $\omega$ -1 19-HETE and the  $\omega$ -2 18-HETE  
346 products (Figure 9A), as confirmed by their MSMS spectra (Figure 9B,C) matching the authentic HETE  
347 standards. It was also able to form the 20-HETE metabolite to a lesser extent (Figure 9A). In order to  
348 determine the potential for azole compounds to inhibit this reaction, we conducted the incubation in the  
349 presence of 10  $\mu\text{M}$  ketoconazole, which significantly reduced the formation of both metabolites (Figure  
350 10), indicating that ketoconazole is an effective *in vitro* inhibitor of the CYP168A1 mediated oxidation of  
351 arachidonic acid. A full kinetic analysis of arachidonic acid metabolism retrieved a  $K_m$  of  $36.3 \pm 17.9 \mu\text{M}$   
352 and a  $V_{max}$  of  $81.7 \pm 32.6 \text{ pmol/min/nmol P450}$  for formation of the 18-HETE metabolite and a  $K_m$  of  $41.1$   
353  $\pm 24.6 \mu\text{M}$  and  $V_{max}$  of  $222 \pm 110 \text{ pmol/min/nmol}$  for formation of the 19-HETE (Figure 11). The  
354 production of both 19-HETE and 18-HETE were subject to substrate inhibition, with negligible levels of  
355 metabolite being formed at substrate concentrations over 200  $\mu\text{M}$ , and a  $K_i$  of  $15.8 \pm 7.9 \mu\text{M}$  and  $13.4 \pm$   
356  $8.1 \mu\text{M}$  for 18- and 19-HETE, respectively. Thus, in comparison to the model substrate, lauric acid, which  
357 exhibited cooperativity in substrate oxidation, arachidonic acid demonstrates substrate inhibition. In  
358 regards to their respective binding conformations in the CYP168A1 active site, arachidonic acid extends  
359 from near the heme iron to the roof of the active site cavity, significantly further than the more compact  
360 lauric acid (Figure 12E,F). It is likely that the larger size of arachidonic acid in comparison to lauric acid  
361 (C20 vs. C12) necessitates it being extended out of the active site, as it is less energetically favorable for  
362 it to adopt a more compact conformation within the active site cavity itself. The extended conformation  
363 may allow multiple ligands to bind at high concentrations of substrate, thereby giving rise to the observed  
364 substrate inhibition.



365           Recently there has been renewed focus on the physiological relevance of substrate inhibition in  
366 enzymatic systems (88,89). It's been estimated that up to 20% of all enzyme systems may be subject to  
367 substrate inhibition (89). Far from being simply a kinetic artifact, substrate inhibition can have important  
368 physiological consequences, including but not limited to: controlling product formation, reducing buildup  
369 of toxic metabolic intermediates, or rapid termination of the signal transduction cascade (89). In terms of  
370 CYP enzymes, substrate inhibition is a well-known phenomenon that occurs often with the mammalian  
371 drug metabolizing CYPs (90). While the biological significance of the substrate inhibition observed with  
372 arachidonic acid remains unclear at this juncture, it is interesting to note that it was only detected with  
373 arachidonic acid, an inflammatory mediator occurring in the natural environment of the lung, and not with  
374 the model substrate lauric acid.

375           Curiously, arachidonic acid is overproduced in CF patients, including those infected with *P.*  
376 *aeruginosa*, due to a metabolic defect (36,91). Therefore, this is a common fatty acid that the organism is  
377 likely to come into contact with in the lung environment of the CF patient. Indeed, a number of studies  
378 have demonstrated the importance of arachidonic acid to the growth and/or virulence of *P. aeruginosa*.  
379 Rao et al. established that addition of arachidonic acid and its oxidation products to *P. aeruginosa* cells  
380 expressing the metabolic regulator *rahU* led to increased biofilm formation (92). Additional work has  
381 shown that an increase in exposure of *P. aeruginosa* to arachidonic acid caused an 8-fold increase in the  
382 minimum inhibitory concentration (MIC) for the antibiotic polymyxin B (93), demonstrating a link  
383 between arachidonic acid and *P. aeruginosa* antibiotic resistance. Furthermore, this same study revealed  
384 that *P. aeruginosa* will incorporate arachidonic acid into its cellular membrane when exposed to it *in vitro*  
385 (93), even though arachidonic acid is not synthesized natively by *P. aeruginosa*. In *in vivo* experiments  
386 using a rat model of *P. aeruginosa* pneumonia, it was observed that several oxidative metabolites of  
387 arachidonic acid, including 20-HETE, contributed to pulmonary vascular hypo reactivity (94). Finally,  
388 Auvin and colleagues showed that dietary supplementation of arachidonic acid in a mouse model of *P.*



389 *aeruginosa* infection led to an increased mortality rate (95). The results from all of these studies point to  
390 an important interaction between *P. aeruginosa* and arachidonic acid and its metabolites.

391 Despite this, little is known of arachidonic acid metabolic pathways in *P. aeruginosa*. To date,  
392 only a single enzyme from *P. aeruginosa*, a secreted lipoxygenase known as LoxA, has been identified  
393 that is capable of metabolizing arachidonic acid, in this case to 15-HETE (38). Intriguingly, an early study  
394 examining metabolism of arachidonic acid derived from human blood polymorphonuclear leukocytes by  
395 *P. aeruginosa* produced two oxidative metabolites that were never completely characterized, but whose  
396 production was inhibited by carbon monoxide and ketoconazole (37), hallmarks of CYP metabolism and  
397 consistent with the results obtained in our study.

398 While it is well known that CYP metabolites of arachidonic acid, including the EETs and HETEs,  
399 are not just metabolic oxidation by-products but are also important regulators of both physiological and  
400 pathophysiological processes (34,96,97), their production has never previously been linked to a microbial  
401 pathogen CYP enzyme. Due to the hydrophobic nature of the arachidonic acid metabolites, they often  
402 tend to accumulate with tissue lipids (98), but upon stimulation with hormones the metabolites are  
403 released to act either through paracrine or autocrine pathways. *In vitro* experiments have demonstrated  
404 that multiple mammalian CYP enzymes, including CYP2E1, CYP2J9, and CYP2U1, can metabolize  
405 arachidonic acid to both the 19- and 20-HETE oxidation products (99-101). In mammals, 19-HETE acts  
406 as a potent vasodilator, renal Na<sup>+</sup>-K<sup>+</sup> ATPase activator, and platelet aggregation inhibitor (102-104).  
407 Whereas 20-HETE, the minor CYP168A1 metabolic product, is known to be important in the regulation  
408 of vascular tone and blood flow, as well as playing a role in inflammation by stimulating the production  
409 of various proinflammatory mediators, including: PGE<sub>2</sub>, cytokine tissue necrosis factor alpha (TNF $\alpha$ ),  
410 and the chemokines IL-8, IL-12, IL-14 (105). The physiological role of 18-HETE is less well defined, but  
411 it may also be important in the regulation of blood flow and blood vessel contractility (106).

412 *P. aeruginosa* is an opportunistic pathogen and can exist as an innocuous soil microorganism in  
413 the natural environment (107). Indeed, recent work examining the potential of *P. aeruginosa* as a

414 bioremediation vector has demonstrated that its complement of CYP enzymes are capable of oxidizing  
415 medium to short chain alkanes (32). It is possible that the *P. aeruginosa* CYPs may have originally  
416 evolved to utilize carbon sources readily available in the local environment, such as lauric acid.

417         Only more recently, evolutionary speaking, has *P. aeruginosa* evolved the ability to adapt to the  
418 mammalian lung (108). As a consequence, its complement of enzymes may now be adjusting to new  
419 roles. In general terms, the adaption of *P. aeruginosa* CYP168A1 to metabolize arachidonic acid to 18-,  
420 19-, and nominally 20-HETE may reflect a burgeoning ability of the pathogen to modulate the immune  
421 response of the host organism in order to make the lung environment more palatable for colonization. A  
422 hallmark of pathogen success as a parasite is the ability for it be able to “communicate” with the host  
423 organism through the production of proteins and small molecule metabolites that have the ability to  
424 modulate the immune response and/or improve the characteristics of the host environment in order to  
425 permit pathogen growth and replication (109,110). *P. aeruginosa* may accomplish this through its  
426 metabolism of arachidonic acid to metabolites, such as 18-, 19-, and 20-HETE, that provide important  
427 physiological functions. While the exact role of the production of these metabolites by *P. aeruginosa*  
428 remains a mystery, it is an area of active investigation in our laboratory, and it may point toward a critical  
429 role for *P. aeruginosa* CYP168A1 in the maintenance of infection.

430         In summary, we have characterized the first CYP enzyme from *P. aeruginosa* as a fatty acid  
431 hydroxylase capable of metabolizing arachidonic acid to 18-, 19-, and nominally 20-HETE, all important  
432 physiological mediators. Further investigation of the role that this enzyme plays in the pathogen life cycle  
433 will likely reveal new insights on its ability to grow and replicate in the mammalian lung and also new  
434 potential drug targets.

## 435 **EXPERIMENTAL PROCEDURES**

436         **Materials.** Lauric, decanoic and stearic acids, and 5-aminolevulinic acid hydrochloride were  
437 purchased from Acros Organics (Fair Lawn, NJ). The 11-hydroxylauric and 12-hydroxylauric-d<sub>20</sub> acid  
438 standards were purchased from Santa Cruz Biotechnology. The 12-hydroxylauric, palmitic and

439 arachidonic (oil) acids, clotrimazole, imidazole, tert-butyl (tBPH) and cumene hydroperoxides (CuOOH)  
440 were obtained from Sigma-Aldrich (St. Louis, MO). Myristic acid and econazole were purchased at VWR  
441 International (Radnor, PA) and ketoconazole was from Toronto Research Chemicals (Toronto, ON,  
442 Canada). Oleic acid and miconazole were obtained from Thermo Fisher Scientific (Waltham, MA).  
443 Ampicillin, arachidonic acid sodium salt, 18-HETE, 19(S)-HETE, 20-HETE and 20-HETE-d<sub>6</sub> were all  
444 purchased from Cayman Chemical (Ann Arbor, MI). Isopropyl-β-D-1-thiogalactopyranoside (IPTG),  
445 phenylmethanesulfonyl fluoride (PMSF), glucose-6-phosphate and β-nicotinamide adenine dinucleotide  
446 phosphate (NADP<sup>+</sup>) were obtained from Alfa Aesar (Haverhill, MA). Glucose-6-phosphate  
447 dehydrogenase, the spinach Fdx and FdR were purchased from Sigma-Aldrich (St. Louis, MO). All other  
448 chemicals and solvents were obtained from standard suppliers and were of reagent or analytical grade.

#### 449 ***Construction of CYP168A1 Expression Vector and Expression of the Recombinant CYP168A1***

450 ***Protein.*** The National Center for Biotechnology Information (NCBI) amino acid sequence NP\_251165 is  
451 a 444 amino acid sequence classified as a putative cytochrome P450 from *P. aeruginosa* PAO1 (111) and  
452 designated according to the P450 nomenclature as CYP168A1 (10). The amino acid sequence was  
453 initially reverse translated to DNA using the Sequence Manipulation Suite website (112). CYP168A1  
454 cDNA sequence was then codon optimized for expression in *E. coli* using the GenScript GenSmart Codon  
455 Optimization Tool (<https://www.genscript.com/gensmart-free-gene-codon-optimization.html>). Finally, the  
456 codon optimized DNA sequence was engineered with four histidine residues at the 3'-end of the sequence  
457 prior to the stop codon and inserted into a pUC57 vector using *NdeI* and *HindIII* engineered restriction  
458 site sequences at the 5' and 3' ends of the CYP168A1 DNA coding sequence, respectively. Following  
459 transformation of *E. coli*-DH5α cells (Invitrogen, Carlsbad, CA), pUC57-CYP168A1 plasmids were  
460 isolated using the Qiagen Miniprep Kit (Qiagen, Hilden Germany). The CYP168A1 optimized cDNA  
461 insert was removed from the plasmid using *NdeI* and *HindIII* restriction enzymes and isolated using  
462 agarose gel electrophoresis and the Qiagen Gel Extraction Kit (Qiagen) for ligation into a similarly  
463 digested and isolated pCWOri<sup>+</sup> CYP expression vector (113). This plasmid, designated as pCWOri-

464 CYP168A1, was then used to transform *E. coli*-DH5 $\alpha$  cells in preparation for expression of the  
465 CYP168A1 protein.

466 CYP168A1 was expressed under the control of the *tac* promoter of the pCWori<sup>+</sup> plasmid using *E.*  
467 *coli*-DH5 $\alpha$  cells in Terrific Broth (TB) medium. Briefly, 10 mL of an overnight pCWori-CYP168A1 *E.*  
468 *coli*-DH5 $\alpha$  starter culture consisting of Luria-Bertani medium supplemented with 200  $\mu$ g/mL ampicillin  
469 was used to inoculate each liter of TB (also containing 200  $\mu$ g/mL ampicillin). The bacterial culture was  
470 incubated at 37°C under agitation (250 rpm) until the optical density reached an absorbance at 600 nm of  
471 0.5 to 0.8. Then IPTG and 5-aminolevulinic acid were added at 0.5 and 0.25 mM, respectively. The  
472 expression culture was allowed to grow for another 24 h at 25°C and 180 rpm agitation. The bacterial  
473 cells were then pelleted by centrifugation at 3,400  $\times$  g and 4°C for 40 min and the cell pellets were stored  
474 at -80°C until purification of the expressed CYP168A1 enzyme.

475 ***Purification of the (His)-Tagged CYP168A1.*** Expressed CYP168A1 was purified using fast  
476 protein liquid chromatography with a HisTrap-HP affinity column (GE Healthcare, Chicago, IL). The  
477 bacterial cell pellets were thawed on ice and resuspended in buffer A consisting of 50 mM Tris-HCl pH  
478 7.5, 50 mM NaCl, 0.1 mM ethylenediaminetetraacetic acid (EDTA), 20 mM imidazole, and 1 mM PMSF.  
479 About 4 mL of buffer A was used for resuspension of a gram of bacterial cell pellet. After addition of  
480 lysozyme (0.3 mg/mL) and DNase (700 U), the bacterial cell suspension was stirred on ice for 30 min.  
481 Cells were then lysed on ice using a Branson sonicator set at 50% power and three 4-min bursts with 2  
482 min resting time between each burst. Following cell lysis, whole cells and cell debris were separated by  
483 ultracentrifugation at 100,000  $\times$  g and 4°C for 60 min.

484 The ultracentrifugation supernatant containing the recombinant CYP168A1 protein was loaded  
485 onto a HisTrap-HP column (5 mL) previously equilibrated with buffer A. The column was subsequently  
486 washed with 5 column volumes of buffer A. CYP168A1 was then eluted with a gradient of imidazole  
487 using the elution buffer B (50 mM Tris-HCl, 0.1 mM EDTA, 0.2 M imidazole). Red-colored fractions

488 were analyzed for purity by SDS-PAGE gel electrophoresis and fractions containing the bulk of the  
489 recombinant CYP168A1 protein were pooled and then dialyzed at 4°C in 50 mM Tris-HCl pH 7.5, 0.1  
490 mM EDTA, and 0.1 mM DTT. The protein concentration of the purified CYP168A1 was determined by  
491 bicinchoninic acid (BCA) assay (Pierce, Thermo Fisher Scientific, Waltham, MA) and the final  
492 concentration of the ferrous-CO protein was determined using UV-visible spectroscopy, with an  
493 extinction coefficient of  $\epsilon = 91 \text{ mM}^{-1} \cdot \text{cm}^{-1}$  at the wavelength of 450 nm (114). UV-visible spectroscopy  
494 was further used to characterize the spectral absorption pattern of the absolute and reduced CYP168A1  
495 protein.

496 ***Ligand  $K_d$  Determination by Optical Difference Spectroscopy.*** To determine ligand selectivity of  
497 CYP168A1, UV-visible difference spectra were acquired on a Varian Cary 50 Bio UV-visible scanning  
498 spectrophotometer (Agilent, Santa Clara, CA) for various ligands, including antifungal azole compounds  
499 and fatty acids. Both sample and reference chambers contained 1 mL of 1  $\mu\text{M}$  CYP168A1 in 100 mM  
500 potassium phosphate, pH 7.4. Prior to initiating the titration, a baseline was recorded between 350 and  
501 500 nm. Aliquots of ligand stock solutions prepared by serial dilution in dimethyl sulfoxide (DMSO)  
502 were added to the sample cuvette, whereas equal volume of vehicle solvent was added to the reference  
503 cuvette to determine the difference spectrum at varying concentrations. The absolute changes in  
504 absorbance deriving from a minimum of triplicate titrations were plotted as a function of ligand  
505 concentration and fitted to the one binding site model using the GraphPad Prism software (version 9.0.0,  
506 GraphPad software, La Jolla, CA).

507 ***Recombinant CYP168A1 Lauric Acid in Vitro Metabolic Assays.*** Due to its high affinity for  
508 CYP168A1 and known activity as a substrate for other microbial CYP enzymes (52,77), lauric acid was  
509 used as a model substrate for metabolism studies. For the hydroperoxide-driven catalysis, solutions of tBPH  
510 and CuOOH were freshly prepared in DMSO and incubated at different concentrations up to 120 min with  
511 1  $\mu\text{M}$  CYP168A1 and 10  $\mu\text{M}$  lauric acid in 100 mM potassium phosphate, pH 7.4 (46). Reactions were  
512 stopped by the addition of an equal volume of ice-cold methanol containing 60 ng/mL 12-hydroxylauric-

513 d<sub>20</sub> acid as internal standard. Samples were centrifuged at 2,500 × g and 4°C for 20 min for protein  
514 precipitation. Supernatants were transferred to high performance liquid chromatography (HPLC) vials, and  
515 aliquots of 5 µL were analyzed by LC-MS. For the redox partner-driven catalysis, different concentrations  
516 of spinach Fdx and FdR were assessed to obtain the optimal CYP/redox partner ratio. Initial linearity  
517 experiments were done establishing linearity up to 30 min. The incubations with the spinach redox partners  
518 (200 µL) were carried out in 100 mM potassium phosphate, pH 7.4 and 3 mM MgCl<sub>2</sub> with 1 µM CYP168A1  
519 and 10 µM lauric acid. Concentrations of spinach Fdx and FdR were between 2 and 20 µM and 0.05 to 0.3  
520 U/mL respectively. After an equilibration at 37°C for 3 min, the reactions, prepared in triplicate, were  
521 initiated by the addition of a NADPH-regenerating system mix consisting of NADP<sup>+</sup> (1 mM), D-glucose-  
522 6-phosphate (10 mM) and glucose-6-phosphate dehydrogenase (2 IU/mL). The reactions were incubated  
523 for 30 min at 37°C under agitation and were stopped by the addition of ice-cold methanol (200 µL)  
524 containing 60 ng/mL 12-hydroxylauric-d<sub>20</sub> acid internal standard. Incubations without the NADPH-  
525 regenerating system mix served as negative controls. Precipitated proteins were collected by centrifugation  
526 of the stopped reaction samples for 20 min at 2,500 × g and 4 °C. Supernatants were transferred to HPLC  
527 vials, and aliquots of 5 µL were analyzed by LC-MS. The 11-hydroxylauric acid metabolite was quantified  
528 based on a calibration curve ranging from 0.1 µM to 10 µM.

529 For the kinetic reactions, similar assay conditions were used with concentrations of lauric acid  
530 ranging from 2.5 to 250 µM. To ensure steady state kinetic conditions and less than 20% substrate  
531 depletion, the concentration of CYP enzyme, Fdx and FdR used was 1 µM, 10 µM and 0.05 U/mL,  
532 respectively. The 11-hydroxylauric acid metabolite was quantified based on a calibration curve prepared  
533 in matrix and ranging from 0.1 µM to 10 µM. The mean metabolite formation rate values obtained from  
534 triplicate determinations were fit to the Michaelis-Menten (hyperbolic) and Hill (sigmoidal) equations  
535 using GraphPad Prism software (version 9.0.0). Comparison of the best fit was based on the second order  
536 Aikake Information Criterion (AICc) analysis (Table 2).

537           ***Lauric Acid Metabolite Analysis by GC-MS.*** Lauric acid metabolites generated in incubations of  
538 100  $\mu$ M lauric acid with CYP168A1 (5  $\mu$ M) and the spinach redox partners Fdx (5  $\mu$ M) and FdR (0.13  
539 U/mL) were extracted twice with dichloromethane and dried at room temperature under nitrogen flow.  
540 Samples, resuspended in acetonitrile, were derivatized by addition of 50  $\mu$ L *N*-methyl-*N*-trimethylsilyl-  
541 trifluoroacetamide (containing trimethylchlorosilane at 1% v/v) followed by 20 min incubation at 70°C.  
542 Derivatized samples were transferred to Teflon capped vials for GC-MS analysis on an Agilent  
543 Technologies 5977/7890 gas chromatograph using an Agilent HP-5MS column (30 m  $\times$  0.25 mm inside  
544 diameter  $\times$  0.25  $\mu$ m). Separation of trimethylsilyl-derivatized lauric acid and hydroxyl metabolites was  
545 achieved by temperature gradient as following: 70°C for 1 min, increased 25°C/min up to 170°C, then  
546 increased 5°C/min up to 200°C and increased 20°C/min up to 280°C, held for 5 min at 280°C. GC  
547 parameters were as follows: inlet temperature of 250°C, splitless constant flow mode at 7.57 mL/min, and  
548 MS transfer line at 230°C. Lauric acid and its metabolites were ionized using electron impact ionization  
549 and detected by a single quadrupole in scan mode from 30-500 mass units. MS parameters were as  
550 follows: source temperature of 230°C, quadrupole temperature of 150°C. The GC-MS system was  
551 controlled by an Agilent MassHunter Workstation. Data was analyzed using Agilent MassHunter  
552 Quantitative Analysis. Identification of the trimethylsilyl-derivatized 11-hydroxylauric acid was  
553 confirmed using an authentic standard and verified using the NIST17 GCMS mass spectral database  
554 (115).

555           ***LC-MS Method for Lauric Acid Hydroxylation.*** The lauric acid incubation samples with the  
556 recombinant CYP168A1 enzyme were analyzed by LC-MS with a Waters Acquity Ultra-Performance  
557 Liquid Chromatography (UPLC) system interfaced by electrospray ionization with a Waters Xevo TQ-S  
558 micro tandem quadrupole mass spectrometer (Waters Corp., Milford, MA) in negative ionization mode and  
559 with multiple reaction monitoring (MRM) scan type. Due to limited fragmentation of lauric acid, its  
560 metabolites and the internal standard, a parent-to-parent mass transition strategy was employed. The  
561 following mass transitions, collision energies (CEs), and cone voltages (CVs) were used to detect the



562 respective analytes: 199.1>199.1, CE = 10 V, CV = 40 V for lauric acid, 215.1>215.1, CE = 10 V, CV =  
563 40 V for the hydroxylauric acid metabolites and 235.2>235.2, CE = 8 V, CV = 20 V for the internal standard  
564 12-hydroxylauric-d<sub>20</sub> acid. The following source conditions were applied: 1 kV for the capillary voltage,  
565 150°C for the source temperature, 500°C for the desolvation temperature and 900 L/h for the desolvation  
566 gas flow. Lauric acid and its hydroxylated metabolites were separated on a Waters BEH C18 column (1.7  
567 µm, 2.1 x 50 mm) by flowing 2 mM ammonium acetate in water and in methanol at 0.4 mL/min. The  
568 following gradient was used: 10% organic (methanol) held for 0.5 min, increased first to 45% over 0.5 min,  
569 then increased to 53% over 2 min, and finally increased to 98% over 0.2 min and held at 98% over 1.8 min.  
570 To limit soiling of the source, a divert directing the LC flow to waste was set at 3.5 min before elution of  
571 lauric acid. The MS peaks were integrated using QuanLynx software (version 4.1, Waters Corp., Milford,  
572 MA), and the analyte/internal standard peak area ratios were used for relative quantification. For  
573 determination of the hydroxy metabolite concentration, the regression fit was based on the analyte/internal  
574 standard peak area ratios calculated from the calibration standards, and the analyte concentration in the  
575 incubations was back-calculated using the weighted (1/x) linear least-squares regression.

576 ***Recombinant CYP168A1 Arachidonic Acid in Vitro Metabolic Assays.*** The same CYP:Fdx:FdR  
577 ratio used for lauric acid kinetic experiments was initially used for assessing linearity in arachidonic acid  
578 metabolism over 60 min. However, under these conditions, metabolite linearity couldn't be established and  
579 decrease in CYP168A1, Fdx and FdR concentrations was necessary. The CYP:Fdx:FdR ratio of 0.5 µM:5  
580 µM:0.025 U/mL allowed to achieve product formation linearity up to 20 min and to stay under steady state  
581 conditions. Incubations of arachidonic acid with CYP168A1 and the spinach redox partners were done with  
582 slight modifications of McDonald et al. (116). Briefly, arachidonic acid (sodium salt) prepared in methanol  
583 to yield final concentrations between 2.5 to 200 µM in the reactions was incubated with CYP168A1 and  
584 the spinach redox partners in 100 mM potassium phosphate (pH 7.4), 3 mM MgCl<sub>2</sub> and 1 mM sodium  
585 pyruvate. After an equilibration at 37°C for 3 min, the reactions, prepared in triplicate, were initiated by the  
586 addition of a NADPH-regenerating system mix consisting of NADP<sup>+</sup> (1 mM), D-glucose-6-phosphate (10



587 mM) and glucose-6-phosphate dehydrogenase (2 IU/mL). After 20 min at 37°C and under agitation, the  
588 enzymatic reactions, done in dim conditions, were stopped by the addition of ice-cold methanol (200 µL)  
589 containing 600 ng/mL 20-HETE-d<sub>6</sub> internal standard and 0.02% 2,6-di-tert-butyl-4-methylphenol.  
590 Incubations without the NADPH-regenerating system mix served as negative controls. For the arachidonic  
591 acid incubations with ketoconazole, a ketoconazole stock solution was made in methanol and was added in  
592 the CYP168A1 reactions prepared in triplicate to yield a final concentration of 10 µM ketoconazole.  
593 Methanol solvent control incubations were done in parallel. Precipitated proteins were collected by  
594 centrifugation of the stopped reaction samples at 2,500 × g and 4 °C for 20 min. Supernatants were  
595 transferred to HPLC vials, and aliquots of 5 µL were analyzed by LC-MS. The 18-HETE and 19-HETE  
596 metabolites were quantified based on calibration curves prepared in matrix and ranging from 0.05 µM to  
597 10 µM and 0.1 µM to 10 µM, respectively. The 19(S)-HETE standard was used to prepare the calibration  
598 curve, since no racemic mixture of 19-HETE was commercially available.

599 ***LC-MS Method for Arachidonic Acid Hydroxylation.*** The arachidonic acid incubation samples  
600 with the recombinant CYP168A1 enzyme were analyzed by LC-MS with a Waters Acquity Ultra-  
601 Performance Liquid Chromatography (UPLC) system interfaced by electrospray ionization with a Waters  
602 Xevo TQ-S micro tandem quadrupole mass spectrometer (Waters Corp., Milford, MA) in negative  
603 ionization mode and with multiple reaction monitoring (MRM) scan type. The following source conditions  
604 were applied: 1 kV for the capillary voltage, 150°C for the source temperature, 500°C for the desolvation  
605 temperature and 900 L/h for the desolvation gas flow. The following mass transitions, collision energies  
606 (CEs), and cone voltages (CVs) were used to detect the respective analytes: 303.1>259.1, CE = 12 V, CV  
607 = 20 V for arachidonic acid, 319.0>261.3, CE = 18 V, CV = 20 V for the 18-HETE, 319.0>231.3, CE = 15  
608 V, CV = 20 V for the 19-HETE, 319.0>289.3, CE = 15 V, CV = 20 V for the 20-HETE and 325.1>281.2,  
609 CE = 15 V, CV = 20 V for the internal standard 20-HETE-d<sub>6</sub>. Arachidonic acid and its hydroxylated  
610 metabolites were separated on a Waters BEH C18 column (1.7 µm, 2.1 x 100 mm) by flowing 2 mM  
611 ammonium acetate in water and in 4:1 acetonitrile:methanol at 0.3 mL/min. The following gradient was

612 used: 55% organic (4:1 acetonitrile:methanol) held for 3.5 min, increased to 98% over 0.5 min, and held at  
613 98% over 2 min. The MS peaks were integrated using QuanLynx software (version 4.1, Waters Corp.,  
614 Milford, MA), and the analyte/internal standard peak area ratios were used for relative quantification. For  
615 determination of the hydroxy metabolite concentration, the regression fit was based on the analyte/internal  
616 standard peak area ratios calculated from the calibration standards, and the analyte concentration in the  
617 incubations was back-calculated using the weighted (1/x) linear least-squares regression. For acquisition of  
618 the HETE metabolite MSMS spectra, daughter scans of  $m/z$  319 were acquired in centroid mode between  
619  $m/z$  of 50 to 350 using the above source conditions and a collision energy of 18 V.

620 ***CYP168A1 Homology Model Construction.*** A BlastP search of the CYP168A1 sequence  
621 (NP\_251165) revealed that the top scoring hit is a protein known as CalO2, a putative CYP enzyme from  
622 *Micromonospora echinospora*, generating a MAX score of 145. However, this organism is not closely  
623 related to *P. aeruginosa*. Therefore, the more closely related second top scoring hit CYP P450 Vdh, from  
624 *P. autotrophic*, was used as a template for building the homology model of CYP168A1. Both CYP168A1  
625 and CYP P450 Vdh were used as target and template, respectively. Due to the lack of similarity of the  
626 first 21 amino acids to any known sequence in the PDB or NCBI RefSeq database, these residues were  
627 omitted for the purposes of homology model construction. This resulted in greater than 90% sequence  
628 homology between CYP168A1 and CYP P450 Vdh. Models were generated using UCSF MODELLER  
629 (50) ran locally via the UCSF Chimera GUI interface (117). MODELLER parameters included an output  
630 of 5 independent models, non-water HETATM residues from the template (heme), and hydrogen atoms.  
631 The final model chosen produced a zDOPE score, an atomic distance-dependent statistical score where  
632 negative values indicate better models, of -0.2. Additionally, the model had a GA341 score of 1. The  
633 GA341 score is a model score derived from statistical potentials where a value >0.7 generally indicates a  
634 reliable model, i.e., >95% probability of having the correct fold. Following initial model generation,  
635 unstructured loops were refined using the loops refinement MODELLER plugin in Chimera. After loop

636 refinement, the zDOPE score was reduced to -1.08 and the GA341 score remained unchanged. This final  
637 refined model was used for all subsequent ligand docking studies.

638 ***Docking of Substrates and Ketoconazole to CYP168A1.*** In order to understand how substrate  
639 and inhibitor ligands structurally interact with CYP168A1, an in silico docking study was undertaken  
640 using AutoDock Vina (53) and the CYP168A1 homology model as the receptor template. The protein  
641 was prepared for docking using MGLTools, AutoDock Tools V. 1.5.7 (The Scripps Research Institute,  
642 USA) by adding polar hydrogens and assigning partial charges. Coordinates for the docking grid search  
643 space were established by defining the enzyme active site, with the final parameters being: grid box  
644 center; x-center = 9.285, y-center = 21.861, z-center = 19.061, and the total number of grid points in each  
645 dimension being; x-dimension = 24.664, y-dimension = 29.966, and z-dimension = 29.793. The ligands  
646 selected for docking were ketoconazole, a Type II inhibitor, and the fatty acid substrates, lauric acid and  
647 arachidonic acid. Each ligand file was downloaded from the Protein Data Bank (PDB:  
648 <https://www.rcsb.org/>) and parameterized for docking in the following manner: 1) addition of polar  
649 hydrogens, 2) assessment (and assignment, when necessary) of rotatable bonds, and 3) assignment of  
650 partial charges. Both receptor (protein) and ligand files were saved in the PDBQT format. A configuration  
651 file docking script was prepared in simple text format with the energy range set to 4 and the  
652 exhaustiveness search parameter set to 8. AutoDock Vina was invoked using the configuration file and  
653 PDBQT.out and log.out files. Output files were qualitatively and quantitatively analyzed by using the  
654 VewDock function of UCSF Chimera, and ranked by binding energy ( $\Delta G$ ). The most energetically  
655 favorable binding mode for each ligand was reported as 0 rmsd. All figures were generated using UCSF  
656 Chimera (117).

657

658 **DATA AVAILABILITY**

659 All data is made publicly available through the JBC repository or may be obtained by contacting  
660 the corresponding author directly.

661

662 **SUPPORTING INFORMATION**

663 The homology model for CYP168A1 used in this study is made available as Supporting Information.

664

665 **ACKNOWLEDGEMENTS**

666 We would like to gratefully acknowledge Michael Armstrong of the CU Skaggs School of  
667 Pharmacy and Pharmaceutical Sciences Mass Spectroscopy facility for assistance provided in confirming  
668 the CYP168A1 lauric acid metabolites.

669

670 **AUTHOR CONTRIBUTIONS**

671 B.C.T., H.M.W., S.E.K., and J.N.L. participated in research design and writing and editing the  
672 manuscript. B.C.T., H.M.W., S.E.K. participated in conducting experiments, data collection, and B.C.T.,  
673 H.M.W., S.E.K., and J.N.L. conducted data analysis. J.N.L directed all aspects of the research conducted.

674

675 **FUNDING AND ADDITIONAL INFORMATION**

676 The research described in this manuscript was generously funded through a University of  
677 Colorado, Skaggs School of Pharmacy and Pharmaceutical Sciences Faculty Start-up Package and the  
678 2021-22 Skaggs Scholar Award.

679

680 **CONFLICT OF INTEREST**

681 The authors declare that they have no conflicts of interest with the contents of this article.

682

683 **ABBREVIATIONS AND NOMENCLATURE**

684

685 **TABLES**

686 **Table 1: CYP168A1 Binding Constants for Fatty Acids and Azoles.**

687

| <b>Ligands</b>     |       | <b>K<sub>d</sub> ± SE (μM)</b> | <b>Δ Absorbance maxima (AU)</b> |
|--------------------|-------|--------------------------------|---------------------------------|
| <b>Fatty acids</b> |       |                                |                                 |
| Hexanoic acid      | C6:0  | ND                             | ND                              |
| Octanoic acid      | C8:0  | ND                             | ND                              |
| Decanoic acid      | C10:0 | 21.0 ± 3.5                     | 0.0159                          |
| Lauric acid        | C12:0 | 1.87 ± 0.33                    | 0.0130                          |
| Myristic acid      | C14:0 | 0.833 ± 0.149                  | 0.0476                          |
| Palmitic acid      | C16:0 | 0.207 ± 0.038                  | 0.0638                          |
| Stearic acid       | C18:0 | 0.327 ± 0.072                  | 0.0784                          |
| Oleic acid         | C18:1 | 0.374 ± 0.065                  | 0.0992                          |
| Arachidonic acid   | C20:4 | 0.960 ± 0.074                  | 0.0583                          |
| <b>Azoles</b>      |       |                                |                                 |
| Clotrimazole       |       | 2.99 ± 0.39                    | 0.0527                          |
| Econazole          |       | 2.46 ± 0.42                    | 0.0256                          |
| Miconazole         |       | 0.882 ± 0.182                  | 0.0359                          |
| Ketoconazole       |       | 0.684 ± 0.076                  | 0.0449                          |

688 ND: no spectral shift detected; SE: standard error.

689

690

691 **Table 2: Comparison of Michaelis-Menten and Hill Fits for Lauric Acid  $\omega$ -1-Hydroxylation by**  
692 **CYP168A1.**

| <b>Model fit</b>             | <b><math>K_m/S_{50} \pm SE</math><br/>(<math>\mu\text{M}</math>)</b> | <b><math>V_{max} \pm SE</math><br/>(nmol/min/nmol P450)</b> | <b><math>R^2</math></b> | <b>Correct fit<br/>probability</b> | <b>Difference<br/>of AICc</b> |
|------------------------------|----------------------------------------------------------------------|-------------------------------------------------------------|-------------------------|------------------------------------|-------------------------------|
| <b>Michaelis-<br/>Menten</b> | $46.1 \pm 5.4$                                                       | $0.138 \pm 0.006$                                           | 0.977                   | 0.02%                              | 16.85                         |
| <b>Hill</b>                  | $33.7 \pm 2.2$<br>( $n = 1.46$ )                                     | $0.118 \pm 0.004$                                           | 0.990                   | 99.98%                             |                               |

693 *n*: cooperativity value for the substrate binding to the enzyme, SE: standard error, AICc: second order  
694 Aikake Information Criterion.

695

696 **FIGURES AND FIGURE LEGENDS**

697

698 **Figure 1. Expression and Spectral Absorption Characteristics of CYP168A1.** (A) SDS-PAGE for the  
699 Ni-NTA fractions (# 1 to 8) of the purified recombinant CYP168A1 protein expressed with a C-terminal  
700 4xHis-tag. (B) Oxidized and reduced absorption spectra of CYP168A1. (C) CO-binding difference  
701 spectra of the reduced CYP168A1 over a 20 min period.

702 **Figure 2. Azole Binding Isotherms with Representative Binding Spectra for CYP168A1.** Binding  
703 isotherms of clotrimazole (A), econazole (B), miconazole (C) and ketoconazole (D), with insets  
704 containing representative binding spectra, were fitted to the one binding site model with  $R^2$  of 0.937,  
705 0.899, 0.871 and 0.939, respectively.

706 **Figure 3. Fatty Acid Binding Isotherms with Representative Binding Spectra for CYP168A1.**  
707 Binding isotherms of decanoic (A), lauric (B), myristic (C), palmitic (D), stearic (E), oleic (F) and  
708 arachidonic (G) acids, with insets containing representative binding spectra, were fitted to the one binding  
709 site model with  $R^2$  of 0.935, 0.906, 0.880, 0.908, 0.897, 0.878 and 0.967, respectively.

710 **Figure 4. *P. aeruginosa* CYP168A1 Metabolizes Lauric Acid to the 11-Hydroxylauric Acid.** Mass  
711 spectra of the trimethylsilyl-derivatized 11-hydroxylauric acid standard (A) and CYP168A1 lauric acid  
712 metabolite (B).

713 **Figure 5. LC-MS Chromatograms of the 11- and 12-Hydroxylauric Acid Metabolites.** Representative  
714 Multiple Reaction Monitoring (MRM) chromatograms for the hydroxyl lauric acid metabolites formed in  
715 incubations of CYP168A1 with lauric acid at 10  $\mu$ M and in presence or absence of NADPH (A).  
716 Representative MRM chromatogram for the 11- and 12-hydroxylauric acid standards at 5  $\mu$ M (B).  
717 Representative MRM chromatogram for the internal standard (IS) 12-hydroxylauric- $d_{20}$  acid (C).

718 **Figure 6. Effect of Hydroperoxides on Lauric Acid Catalysis by CYP168A1.** The relative  
719 quantification of the 11-hydroxylauric acid metabolite formed by CYP168A1 with the hydroperoxides

720 (tBPH, tert-butyl hydroperoxide and CuOOH, cumene hydroperoxide) was achieved by LC-MS and peak  
721 area ratios of the 11-hydroxylauric acid were reported with their respective standard deviations  
722 represented graphically as error bars.

723 **Figure 7. Effect of the Spinach Redox Partners on Lauric Acid Catalysis by CYP168A1.**

724 Quantification of the 11-hydroxylauric acid metabolite formed with increasing Fdx concentrations at  
725 fixed CYP168A1 (1  $\mu$ M) and FdR (0.1 U/mL) concentrations (A) and with increasing FdR concentrations  
726 at fixed CYP168A1 (1  $\mu$ M) and Fdx (10  $\mu$ M) concentrations (B). The bar graphs represent the mean of  
727 assays performed in triplicate, with error bars representing standard deviations.

728 **Figure 8. Kinetic of Lauric Acid  $\omega$ -1-Hydroxylation by CYP168A1.** Lauric acid  $\omega$ -1-hydroxylation by  
729 CYP168A1 best fitted the Hill equation. Each data point represents the mean of assays performed in  
730 triplicate, with error bars representing the standard deviations (some of the error bars being too small to  
731 be observed). The coefficient of determinations,  $R^2$ , for the regression model fit of the 11-hydroxylauric  
732 acid kinetic was 0.990.

733 **Figure 9. *P. aeruginosa* CYP168A1 Metabolizes Arachidonic Acid to the 18- and 19-HETE**

734 **Metabolites.** Representative MRM chromatograms for the arachidonic acid and its 18-, 19- and 20-HETE  
735 metabolites formed in incubations with the recombinant CYP168A1 in presence of the spinach redox  
736 partners and the co-factor NADPH, including the MRM chromatogram for the internal standard 20-  
737 HETE- $d_6$  (A). LC-MS/MS spectra for the 19-HETE (B) and 18-HETE (C) metabolites formed in  
738 arachidonic acid incubation with CYP168A1, including structure fragmentation insets.

739 **Figure 10. Inhibition by Ketoconazole of CYP168A1 18- and 19-HETE Formation.** Representative

740 MRM chromatograms for 18- (A) and 19-HETE (B) formed in incubations of arachidonic acid with  
741 CYP168A1 using the spinach redox partners and the co-factor NADPH in absence (solvent control,  
742 dotted line) or presence of ketoconazole (10  $\mu$ M, solid line).



743 **Figure 11. Kinetic of Arachidonic Acid  $\omega$ -1- and  $\omega$ -2-Hydroxylation by CYP168A1.** Arachidonic acid  
744  $\omega$ -2- (A) and  $\omega$ -1-hydroxylation (B) by CYP168A1 fitted the substrate inhibition model. Each data point  
745 represents the mean of assays performed in triplicate, with error bars representing standard deviations.  
746 The coefficient of determinations,  $R^2$ , for the regression model fit of 18- and 19-HETE kinetics were  
747 0.911 and 0.901, respectively.

748 **Figure 12. Docking of Ligands to the CYP168A1 Homology Model.** (A) Stylized amino acid backbone  
749 of the CYP168A1 homology model, with the heme prosthetic group shown in red (in all structures), (B)  
750 the P-cast defined active site of the enzyme (represented by magenta balls), (C) aromatic residues of  
751 CYP168A1 (shown in cyan), (D) active site cutaway of the docked structure of ketoconazole (cyan)  
752 within the CYP168A1 active site, showing the azole nitrogen in close proximity to the heme iron, (E)  
753 active site cutaway of docked structure of lauric acid (magenta); for simplicity sake, only the carbon  
754 skeleton backbone is shown; note the kinked and extended structure of the substrate, (F) active site  
755 cutaway of the docked structure of arachidonic acid (magenta) within the CYP168A1 active site; the  
756 conformation of the substrate is similarly kinked and extended as in the case of lauric acid. All figures  
757 were generated using UCSF Chimera (<https://www.cgl.ucsf.edu/chimera/>).

758

759

760

761 **FIGURE 1**

762

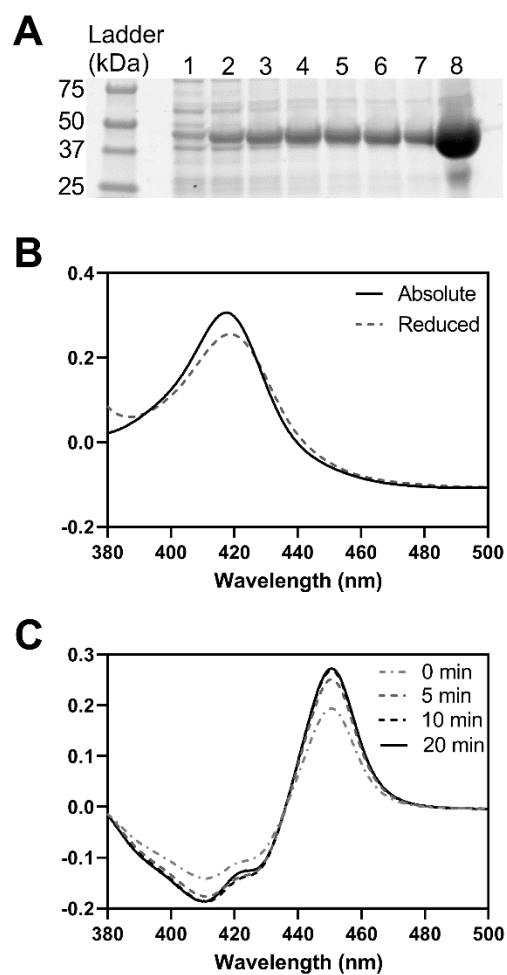

763

764

765 **FIGURE 2**

766

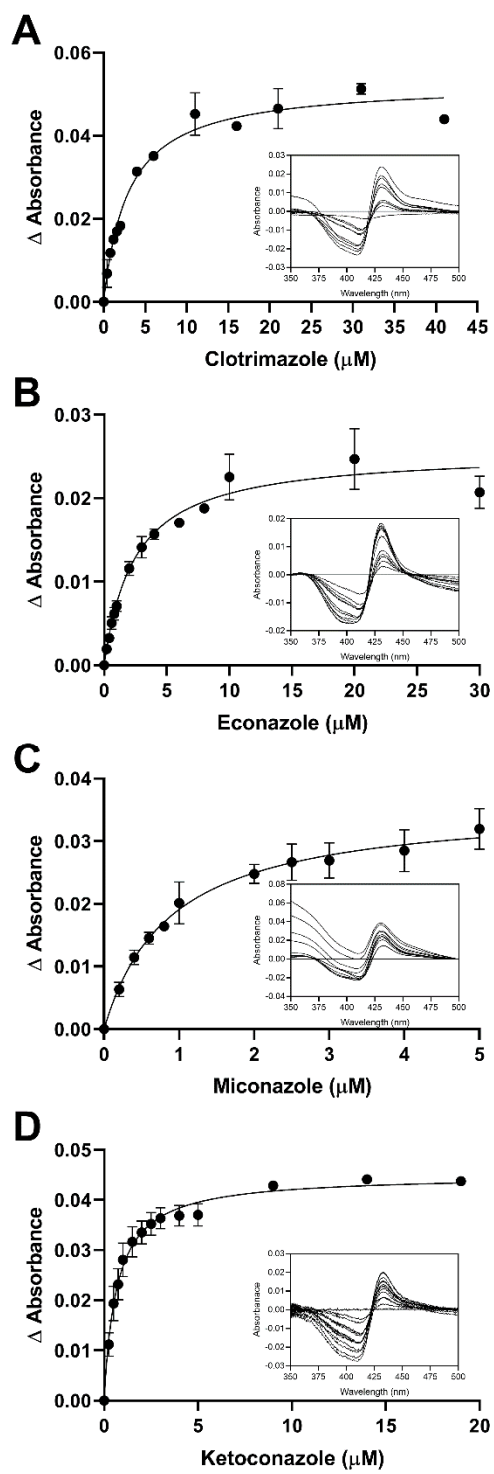

767

768

769 **FIGURE 3**

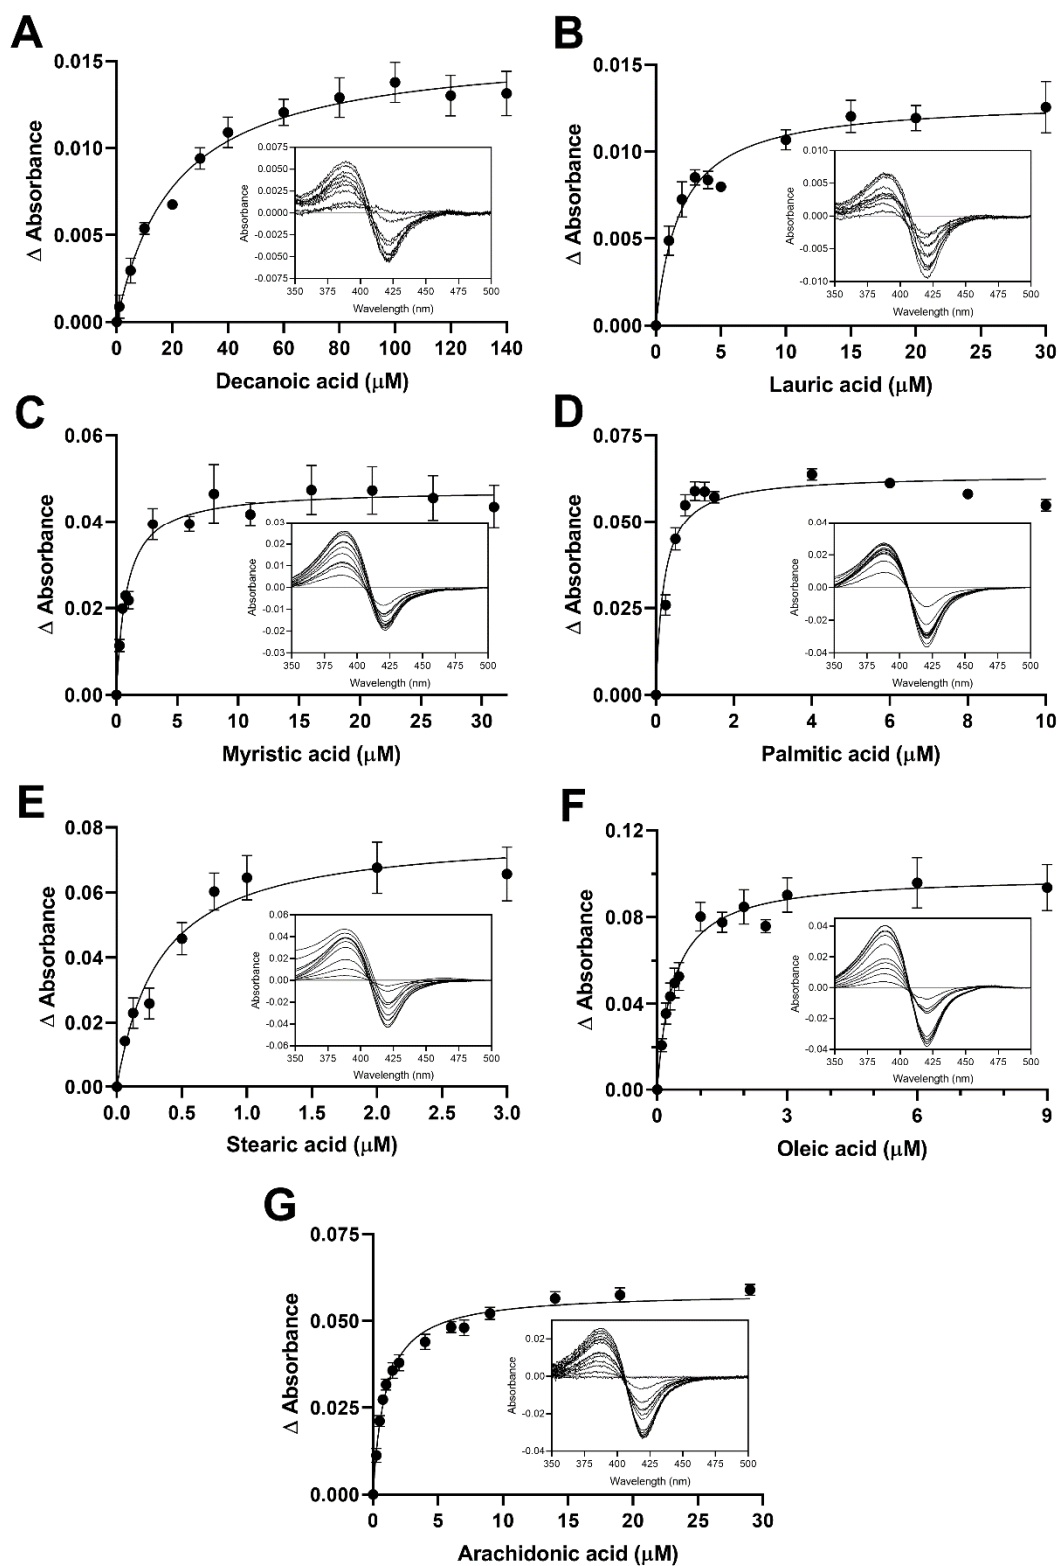

770

771 **FIGURE 4**

772

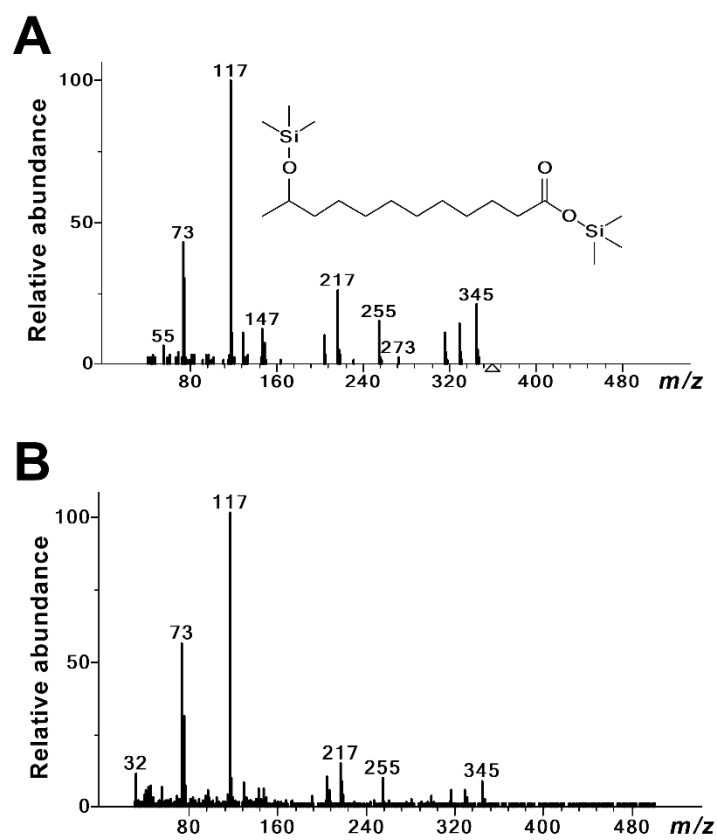

773

774

775

776 **FIGURE 5**

777

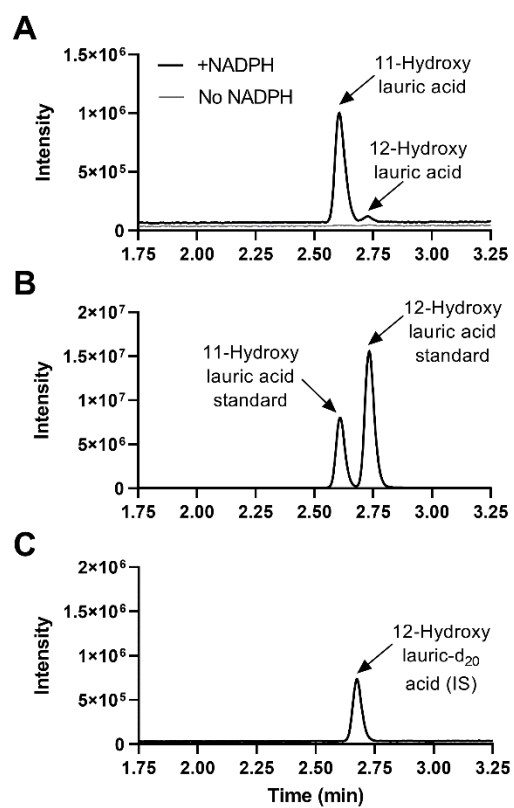

778

779

780

781

782 **FIGURE 6**

783

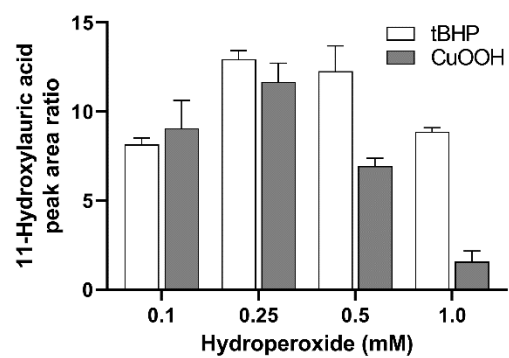

784

785

786

787 **FIGURE 7**

788

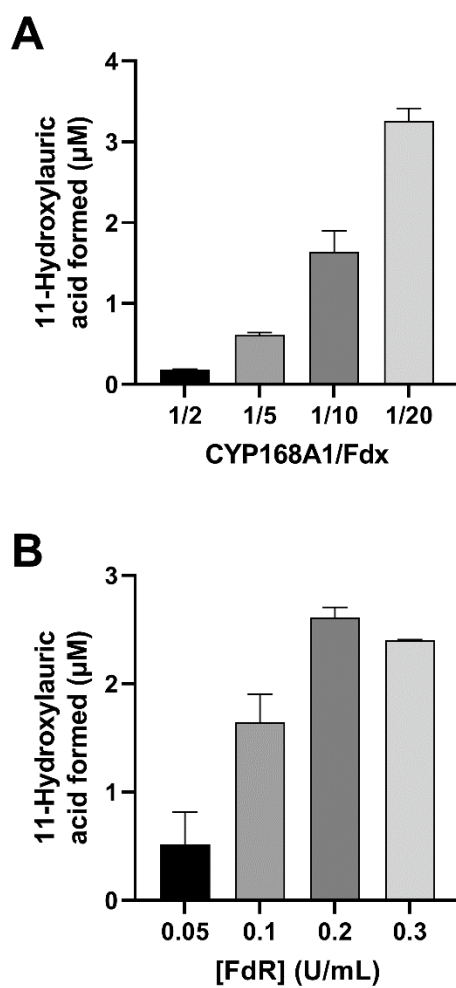

789

790

791



792 **FIGURE 8**

793

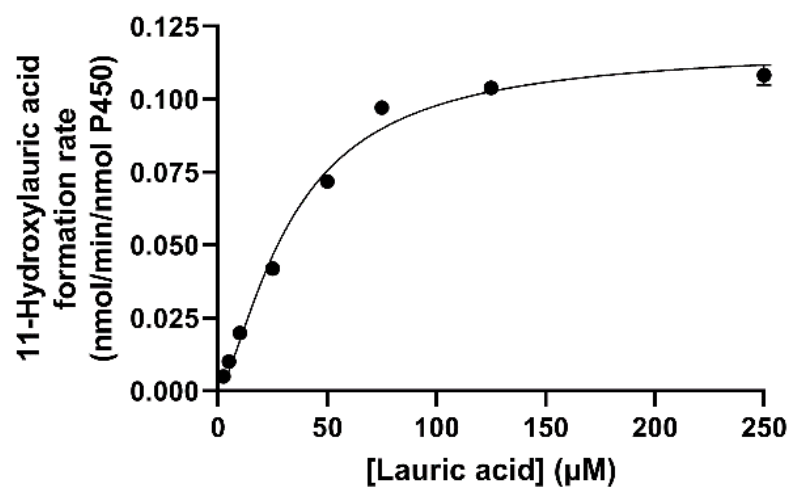

794

795

796

797 **FIGURE 9**

798

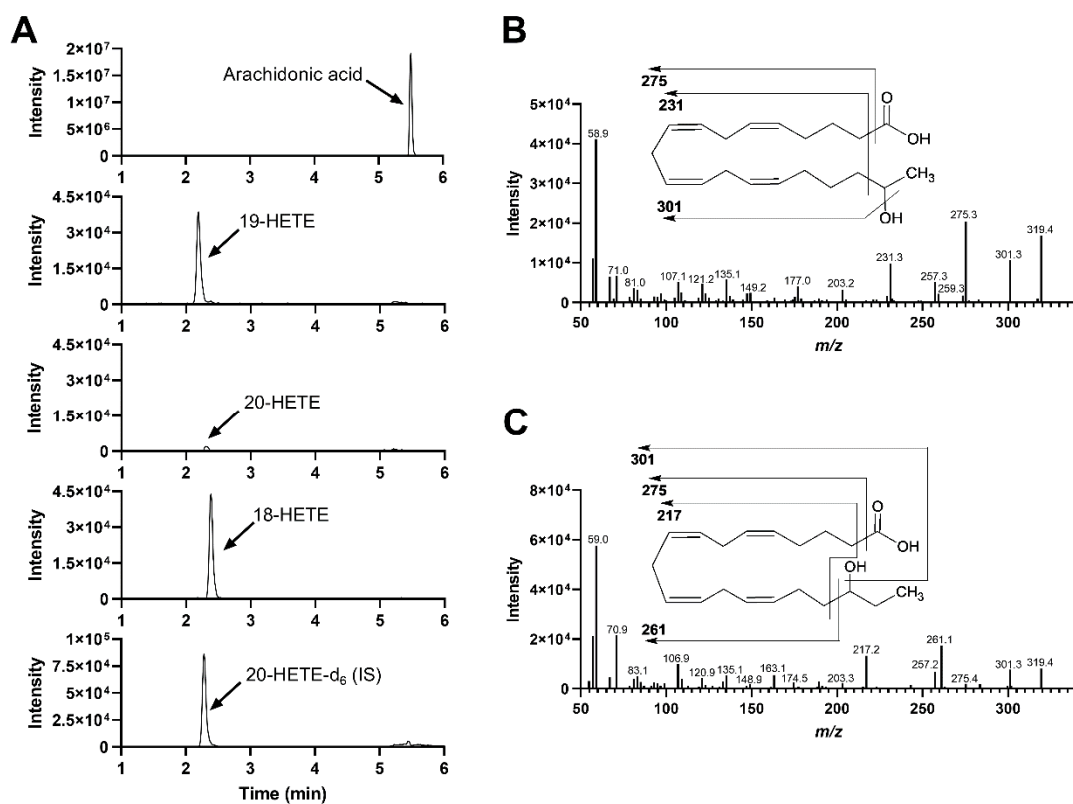

799

800

801

802

803

804

805 **FIGURE 10**

806

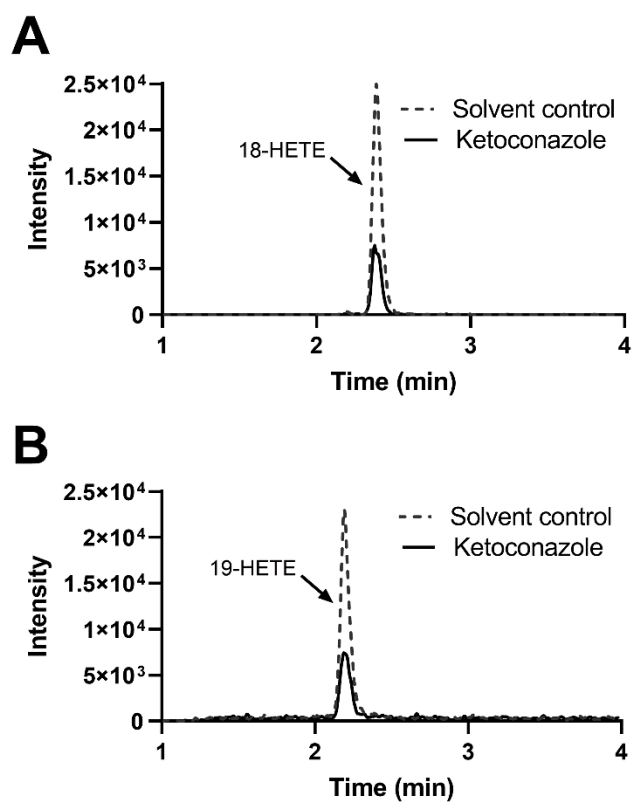

807

808

809

810 **FIGURE 11**

811

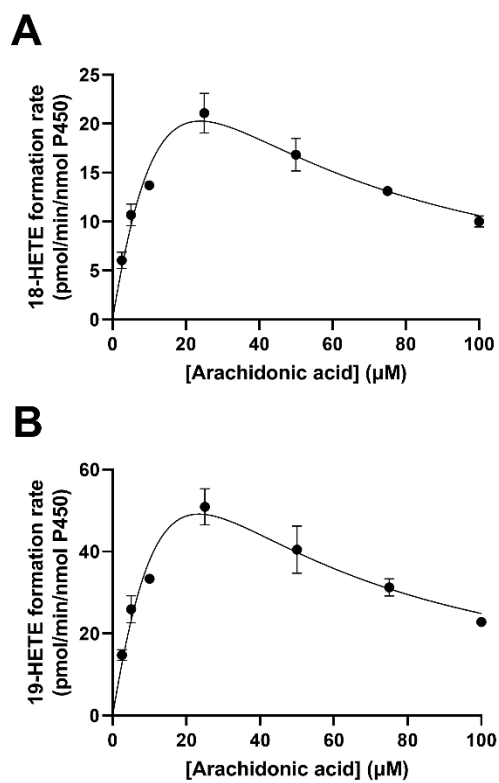

812

813

814

815

816

817 **FIGURE 12**

A.

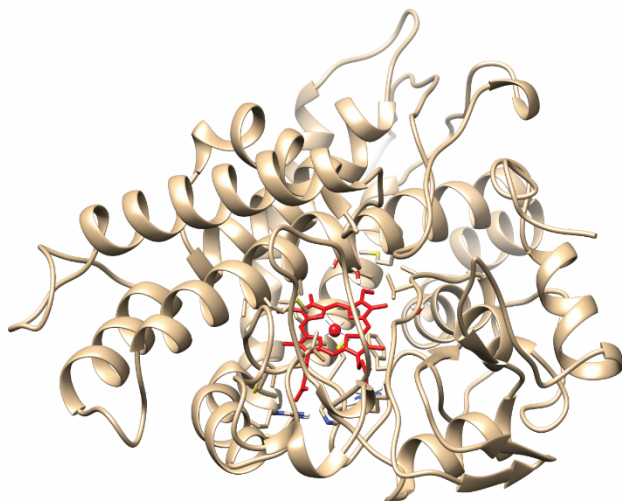

B.

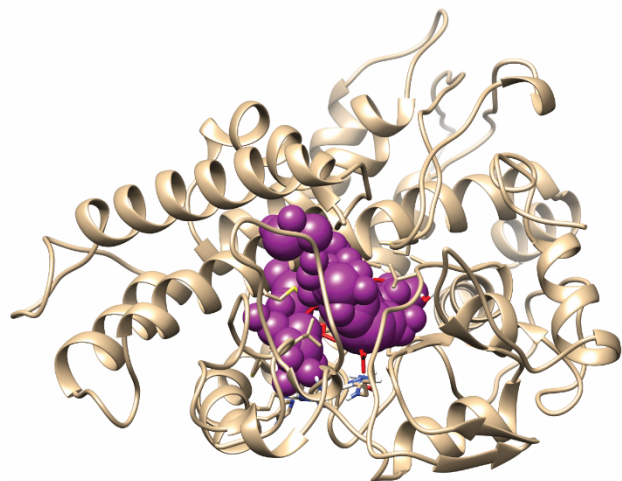

C.

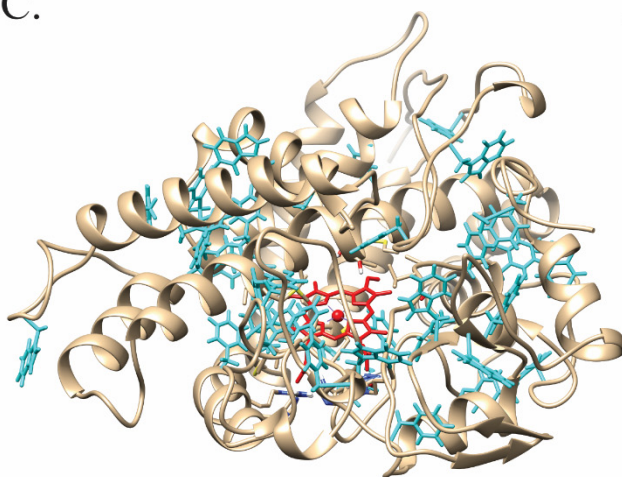

D.

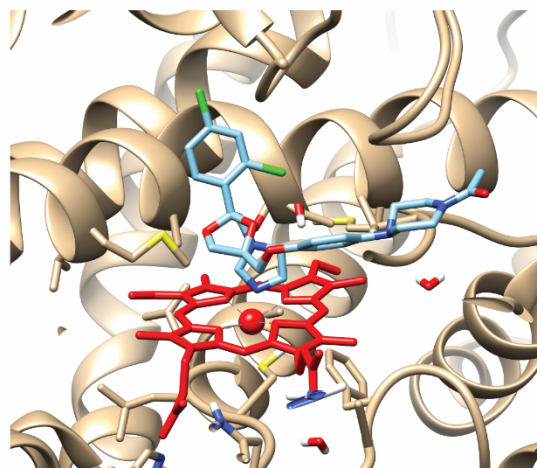

E.

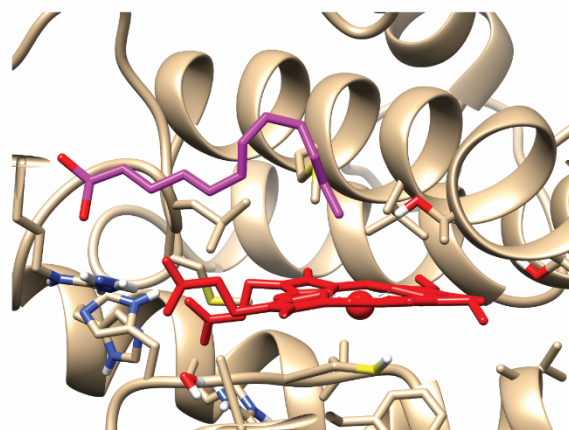

F.

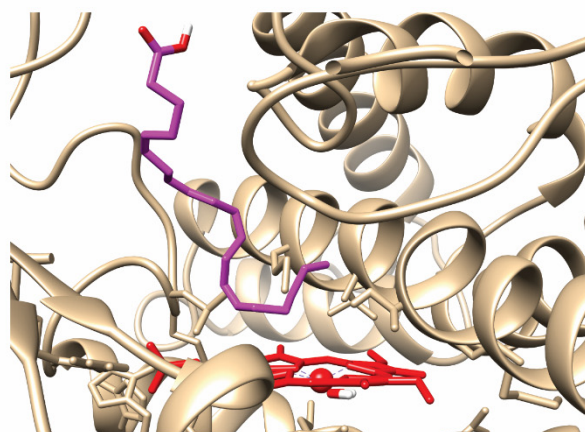

818

819

## 820 REFERENCES

- 821 1. Bhagirath, A. Y., Li, Y., Somayajula, D., Dadashi, M., Badr, S., and Duan, K. (2016) Cystic fibrosis  
822 lung environment and *Pseudomonas aeruginosa* infection. *BMC Pulm Med* **16**, 174
- 823 2. Lund-Palau, H., Turnbull, A. R., Bush, A., Bardin, E., Cameron, L., Soren, O., Wierre-Gore, N.,  
824 Alton, E. W., Bundy, J. G., Connett, G., Faust, S. N., Filloux, A., Freemont, P., Jones, A., Khoo, V.,  
825 Morales, S., Murphy, R., Pabary, R., Simbo, A., Schelenz, S., Takats, Z., Webb, J., Williams, H. D.,  
826 and Davies, J. C. (2016) *Pseudomonas aeruginosa* infection in cystic fibrosis: pathophysiological  
827 mechanisms and therapeutic approaches. *Expert Rev Respir Med* **10**, 685-697
- 828 3. Scotet, V., L'Hostis, C., and Ferec, C. (2020) The Changing Epidemiology of Cystic Fibrosis:  
829 Incidence, Survival and Impact of the CFTR Gene Discovery. *Genes (Basel)* **11**
- 830 4. Buret, A., and Cripps, A. W. (1993) The immunoevasive activities of *Pseudomonas aeruginosa*.  
831 Relevance for cystic fibrosis. *Am Rev Respir Dis* **148**, 793-805
- 832 5. Gellatly, S. L., and Hancock, R. E. (2013) *Pseudomonas aeruginosa*: new insights into  
833 pathogenesis and host defenses. *Pathog Dis* **67**, 159-173
- 834 6. Moreau-Marquis, S., Stanton, B. A., and O'Toole, G. A. (2008) *Pseudomonas aeruginosa* biofilm  
835 formation in the cystic fibrosis airway. *Pulm Pharmacol Ther* **21**, 595-599
- 836 7. Schultz, A. N., Hoiby, N., Nielsen, X. C., Pressler, T., Dalhoff, K., Duno, M., Buchard, A., Johansen,  
837 H. K., Wang, H., and Dalboge, C. S. (2017) Individual pharmacokinetic variation leads to  
838 underdosing of ciprofloxacin in some cystic fibrosis patients. *Pediatr Pulmonol* **52**, 319-323
- 839 8. Lyczak, J. B., Cannon, C. L., and Pier, G. B. (2002) Lung infections associated with cystic fibrosis.  
840 *Clin Microbiol Rev* **15**, 194-222
- 841 9. Stover, C. K., Pham, X. Q., Erwin, A. L., Mizoguchi, S. D., Warren, P., Hickey, M. J., Brinkman, F.  
842 S., Hufnagle, W. O., Kowalik, D. J., Lagrou, M., Garber, R. L., Goltry, L., Tolentino, E., Westbrook-  
843 Wadman, S., Yuan, Y., Brody, L. L., Coulter, S. N., Folger, K. R., Kas, A., Larbig, K., Lim, R., Smith,  
844 K., Spencer, D., Wong, G. K., Wu, Z., Paulsen, I. T., Reizer, J., Saier, M. H., Hancock, R. E., Lory, S.,  
845 and Olson, M. V. (2000) Complete genome sequence of *Pseudomonas aeruginosa* PAO1, an  
846 opportunistic pathogen. *Nature* **406**, 959-964
- 847 10. Nelson, D. R. (2009) The cytochrome p450 homepage. *Hum Genomics* **4**, 59-65
- 848 11. Zhou, S., Song, L., Masschelein, J., Sumang, F. A. M., Papa, I. A., Zulaybar, T. O., Custodio, A. B.,  
849 Zabala, D., Alcantara, E. P., de Los Santos, E. L. C., and Challis, G. L. (2019) Pentamycin  
850 Biosynthesis in Philippine *Streptomyces* sp. S816: Cytochrome P450-Catalyzed Installation of the  
851 C-14 Hydroxyl Group. *ACS Chem Biol* **14**, 1305-1309
- 852 12. Kim, V., Lim, Y. R., Lee, I., Lee, J. H., Han, S., Pham, T. V., Kim, H., Lee, R., Kang, L. W., and Kim, D.  
853 (2020) Structural insights into CYP107G1 from rapamycin-producing *Streptomyces*  
854 *rapamycinicus*. *Arch Biochem Biophys* **692**, 108544
- 855 13. Roberts, A. G., Díaz, M. D., Lampe, J. N., Shireman, L. M., Grinstead, J. S., Dabrowski, M. J.,  
856 Pearson, J. T., Bowman, M. K., Atkins, W. M., and Campbell, A. P. (2006) NMR studies of ligand  
857 binding to P450(eryF) provides insight into the mechanism of cooperativity. *Biochemistry* **45**,  
858 1673-1684
- 859 14. Patteson, J. B., Cai, W., Johnson, R. A., Santa Maria, K. C., and Li, B. (2018) Identification of the  
860 Biosynthetic Pathway for the Antibiotic Bicyclomycin. *Biochemistry* **57**, 61-65
- 861 15. Gonvindaraj, S., Li, H., and Poulos, T. L. (1994) Flavin supported fatty acid oxidation by the heme  
862 domain of *Bacillus megaterium* cytochrome P450BM-3. *Biochem Biophys Res Commun* **203**,  
863 1745-1749
- 864 16. Liang, B., Cheng, H., Van Nostrand, J. D., Ma, J., Yu, H., Kong, D., Liu, W., Ren, N., Wu, L., Wang,  
865 A., Lee, D. J., and Zhou, J. (2014) Microbial community structure and function of nitrobenzene  
866 reduction biocathode in response to carbon source switchover. *Water Res* **54**, 137-148

- 867 17. Hirakawa, K., Kobayashi, S., Inoue, T., Endoh-Yamagami, S., Fukuda, R., and Ohta, A. (2009)  
868 Yas3p, an Opi1 family transcription factor, regulates cytochrome P450 expression in response to  
869 n-alkanes in *Yarrowia lipolytica*. *J Biol Chem* **284**, 7126-7137
- 870 18. Huang, L., Wang, W., Zanaroli, G., Xu, P., and Tang, H. (2021) Hexabromocyclododecanes Are  
871 Dehalogenated by CYP168A1 from *Pseudomonas aeruginosa* Strain HS9. *Appl Environ Microbiol*  
872 **87**, e0082621
- 873 19. Adris, P., Lopez-Estraño, C., and Chung, K. T. (2007) The metabolic activation of 2-aminofluorine,  
874 4-aminobiphenyl, and benzidine by cytochrome P-450-107S1 of *Pseudomonas aeruginosa*.  
875 *Toxicol In Vitro* **21**, 1663-1671
- 876 20. Wlodarczyk, A., Gnanasekaran, T., Nielsen, A. Z., Zulu, N. N., Mellor, S. B., Luckner, M., Thøfner,  
877 J. F. B., Olsen, C. E., Mottawie, M. S., Burow, M., Pribil, M., Feussner, I., Møller, B. L., and Jensen,  
878 P. E. (2016) Metabolic engineering of light-driven cytochrome P450 dependent pathways into  
879 *Synechocystis* sp. PCC 6803. *Metab Eng* **33**, 1-11
- 880 21. Álvarez-Álvarez, R., Botas, A., Albillos, S. M., Rumbero, A., Martín, J. F., and Liras, P. (2015)  
881 Molecular genetics of naringenin biosynthesis, a typical plant secondary metabolite produced by  
882 *Streptomyces clavuligerus*. *Microb Cell Fact* **14**, 178
- 883 22. Stöckli, M., Morinaka, B. I., Lackner, G., Kombrink, A., Sieber, R., Margot, C., Stanley, C. E.,  
884 deMello, A. J., Piel, J., and Künzler, M. (2019) Bacteria-induced production of the antibacterial  
885 sesquiterpene lagopodin B in *Coprinopsis cinerea*. *Mol Microbiol* **112**, 605-619
- 886 23. Ouellet, H., Johnston, J. B., and Ortiz de Montellano, P. R. (2010) The Mycobacterium  
887 tuberculosis cytochrome P450 system. *Arch Biochem Biophys* **493**, 82-95
- 888 24. Ouellet, H., Podust, L. M., and de Montellano, P. R. (2008) Mycobacterium tuberculosis CYP130:  
889 crystal structure, biophysical characterization, and interactions with antifungal azole drugs. *J Biol*  
890 *Chem* **283**, 5069-5080
- 891 25. Recchi, C., Sclavi, B., Rauzier, J., Gicquel, B., and Reytrat, J. M. (2003) Mycobacterium tuberculosis  
892 Rv1395 is a class III transcriptional regulator of the AraC family involved in cytochrome P450  
893 regulation. *J Biol Chem* **278**, 33763-33773
- 894 26. Ghorbani, P., Santhakumar, P., Hu, Q., Djiaideu, P., Wolever, T. M., Palaniyar, N., and Grasemann,  
895 H. (2015) Short-chain fatty acids affect cystic fibrosis airway inflammation and bacterial growth.  
896 *Eur Respir J* **46**, 1033-1045
- 897 27. Ouellet, H., Johnston, J. B., and de Montellano, P. R. (2011) Cholesterol catabolism as a  
898 therapeutic target in Mycobacterium tuberculosis. *Trends Microbiol* **19**, 530-539
- 899 28. Van der Geize, R., Yam, K., Heuser, T., Wilbrink, M. H., Hara, H., Anderton, M. C., Sim, E.,  
900 Dijkhuizen, L., Davies, J. E., Mohn, W. W., and Eltis, L. D. (2007) A gene cluster encoding  
901 cholesterol catabolism in a soil actinomycete provides insight into Mycobacterium tuberculosis  
902 survival in macrophages. *Proc Natl Acad Sci U S A* **104**, 1947-1952
- 903 29. Malwal, S. R., Zimmerman, M. D., Alvarez, N., Sarathy, J. P., Dartois, V., Nacy, C. A., and Oldfield,  
904 E. (2021) Structure, In Vivo Detection, and Antibacterial Activity of Metabolites of SQ109, an  
905 Anti-Infective Drug Candidate. *ACS Infect Dis* **7**, 2492-2507
- 906 30. Bukhdruker, S., Varaksa, T., Grabovec, I., Marin, E., Shabunya, P., Kadukova, M., Grudin, S.,  
907 Kavaleuski, A., Gusach, A., Gilep, A., Borshchevskiy, V., and Strushkevich, N. (2020)  
908 Hydroxylation of Antitubercular Drug Candidate, SQ109, by Mycobacterial Cytochrome P450. *Int*  
909 *J Mol Sci* **21**
- 910 31. Li, Y. P., Pan, J. C., and Ma, Y. L. (2020) Elucidation of multiple alkane hydroxylase systems in  
911 biodegradation of crude oil n-alkane pollution by *Pseudomonas aeruginosa* DN1. *J Appl*  
912 *Microbiol* **128**, 151-160



- 913 32. Liu, H., Xu, J., Liang, R., and Liu, J. (2014) Characterization of the medium- and long-chain n-  
914 alkanes degrading *Pseudomonas aeruginosa* strain SJTD-1 and its alkane hydroxylase genes.  
915 *PLoS One* **9**, e105506
- 916 33. Johnson, A. L., Edson, K. Z., Totah, R. A., and Rettie, A. E. (2015) Cytochrome P450  $\omega$ -  
917 Hydroxylases in Inflammation and Cancer. *Adv Pharmacol* **74**, 223-262
- 918 34. Powell, W. S., and Rokach, J. (2015) Biosynthesis, biological effects, and receptors of  
919 hydroxyeicosatetraenoic acids (HETEs) and oxoeicosatetraenoic acids (oxo-ETEs) derived from  
920 arachidonic acid. *Biochim Biophys Acta* **1851**, 340-355
- 921 35. Sun, Y., Wu, D., Zeng, W., Chen, Y., Guo, M., Lu, B., Li, H., Sun, C., Yang, L., Jiang, X., and Gao, Q.  
922 (2021) The Role of Intestinal Dysbacteriosis Induced Arachidonic Acid Metabolism Disorder in  
923 Inflammaging in Atherosclerosis. *Front Cell Infect Microbiol* **11**, 618265
- 924 36. Carlstedt-Duke, J., Bronnegard, M., and Strandvik, B. (1986) Pathological regulation of  
925 arachidonic acid release in cystic fibrosis: the putative basic defect. *Proc Natl Acad Sci U S A* **83**,  
926 9202-9206
- 927 37. Sorrell, T. C., Muller, M., and Sztelma, K. (1992) Bacterial metabolism of human  
928 polymorphonuclear leukocyte-derived arachidonic acid. *Infect Immun* **60**, 1779-1785
- 929 38. Vance, R. E., Hong, S., Gronert, K., Serhan, C. N., and Mekalanos, J. J. (2004) The opportunistic  
930 pathogen *Pseudomonas aeruginosa* carries a secretable arachidonate 15-lipoxygenase. *Proc Natl*  
931 *Acad Sci U S A* **101**, 2135-2139
- 932 39. Bannenberg, G. L., Aliberti, J., Hong, S., Sher, A., and Serhan, C. (2004) Exogenous pathogen and  
933 plant 15-lipoxygenase initiate endogenous lipoxin A4 biosynthesis. *J Exp Med* **199**, 515-523
- 934 40. Flitter, B. A., Hvorecny, K. L., Ono, E., Eddens, T., Yang, J., Kwak, D. H., Bahl, C. D., Hampton, T.  
935 H., Morisseau, C., Hammock, B. D., Liu, X., Lee, J. S., Kolls, J. K., Levy, B. D., Madden, D. R., and  
936 Bomberger, J. M. (2017) *Pseudomonas aeruginosa* sabotages the generation of host  
937 proresolving lipid mediators. *Proc Natl Acad Sci U S A* **114**, 136-141
- 938 41. Thornton, J. M., Walker, J. M., Sundarasivarao, P. Y. K., Spur, B. W., Rodriguez, A., and Yin, K.  
939 (2021) Lipoxin A4 promotes reduction and antibiotic efficacy against *Pseudomonas aeruginosa*  
940 biofilm. *Prostaglandins Other Lipid Mediat* **152**, 106505
- 941 42. Tooker, B. C., Kandel, S.E., Work, H.M., Lampe, J.N. (2021) Expression and characterization of *P.*  
942 *aeruginosa* Cytochrome P450 CYP168A1. *FASEB J.* **35**, 2588-2589
- 943 43. Isin, E. M., and Guengerich, F. P. (2008) Substrate binding to cytochromes P450. *Anal Bioanal*  
944 *Chem* **392**, 1019-1030
- 945 44. Ouellet, H., Guan, S., Johnston, J. B., Chow, E. D., Kells, P. M., Burlingame, A. L., Cox, J. S., Podust,  
946 L. M., and de Montellano, P. R. (2010) Mycobacterium tuberculosis CYP125A1, a steroid C27  
947 monooxygenase that detoxifies intracellularly generated cholest-4-en-3-one. *Mol Microbiol* **77**,  
948 730-742
- 949 45. Kandel, S., Morant, M., Benveniste, I., Blée, E., Werck-Reichhart, D., and Pinot, F. (2005) Cloning,  
950 functional expression, and characterization of CYP709C1, the first sub-terminal hydroxylase of  
951 long chain fatty acid in plants. Induction by chemicals and methyl jasmonate. *J Biol Chem* **280**,  
952 35881-35889
- 953 46. Strohmaier, S. J., De Voss, J. J., Jurva, U., Andersson, S., and Gillam, E. M. J. (2020) Oxygen  
954 Surrogate Systems for Supporting Human Drug-Metabolizing Cytochrome P450 Enzymes. *Drug*  
955 *Metab Dispos* **48**, 432-437
- 956 47. Portet, S. (2020) A primer on model selection using the Akaike Information Criterion. *Infect Dis*  
957 *Model* **5**, 111-128
- 958 48. Weiss, J. N. (1997) The Hill equation revisited: uses and misuses. *FASEB J* **11**, 835-841



- 959 49. Yasutake, Y., Fujii, Y., Nishioka, T., Cheon, W. K., Arisawa, A., and Tamura, T. (2010) Structural  
960 evidence for enhancement of sequential vitamin D3 hydroxylation activities by directed  
961 evolution of cytochrome P450 vitamin D3 hydroxylase. *J Biol Chem* **285**, 31193-31201
- 962 50. Webb, B., and Sali, A. (2016) Comparative Protein Structure Modeling Using MODELLER. *Curr*  
963 *Protoc Bioinformatics* **54**, 5.6.1-5.6.37
- 964 51. Kelly, S. L., and Kelly, D. E. (2013) Microbial cytochromes P450: biodiversity and biotechnology.  
965 Where do cytochromes P450 come from, what do they do and what can they do for us? *Philos*  
966 *Trans R Soc Lond B Biol Sci* **368**, 20120476
- 967 52. Puchkaev, A. V., Wakagi, T., and Ortiz de Montellano, P. R. (2002) CYP119 plus a *Sulfolobus*  
968 *tokodaii* strain 7 ferredoxin and 2-oxoacid:ferredoxin oxidoreductase constitute a high-  
969 temperature cytochrome P450 catalytic system. *J Am Chem Soc* **124**, 12682-12683
- 970 53. Trott, O., and Olson, A. J. (2010) AutoDock Vina: improving the speed and accuracy of docking  
971 with a new scoring function, efficient optimization, and multithreading. *J Comput Chem* **31**, 455-  
972 461
- 973 54. Roussel, F., Khan, K. K., and Halpert, J. R. (2000) The importance of SRS-1 residues in catalytic  
974 specificity of human cytochrome P450 3A4. *Arch Biochem Biophys* **374**, 269-278
- 975 55. Müller, C. S., Knehans, T., Davydov, D. R., Bounds, P. L., von Mandach, U., Halpert, J. R., Cafilisch,  
976 A., and Koppenol, W. H. (2015) Concurrent cooperativity and substrate inhibition in the  
977 epoxidation of carbamazepine by cytochrome P450 3A4 active site mutants inspired by  
978 molecular dynamics simulations. *Biochemistry* **54**, 711-721
- 979 56. He, Y. A., Roussel, F., and Halpert, J. R. (2003) Analysis of homotropic and heterotropic  
980 cooperativity of diazepam oxidation by CYP3A4 using site-directed mutagenesis and kinetic  
981 modeling. *Arch Biochem Biophys* **409**, 92-101
- 982 57. Johnston, J. B., Kells, P. M., Podust, L. M., and Ortiz de Montellano, P. R. (2009) Biochemical and  
983 structural characterization of CYP124: a methyl-branched lipid omega-hydroxylase from  
984 *Mycobacterium tuberculosis*. *Proc Natl Acad Sci U S A* **106**, 20687-20692
- 985 58. Ortega Ugalde, S., Boot, M., Commandeur, J. N. M., Jennings, P., Bitter, W., and Vos, J. C. (2019)  
986 Function, essentiality, and expression of cytochrome P450 enzymes and their cognate redox  
987 partners in *Mycobacterium tuberculosis*: are they drug targets? *Applied Microbiology and*  
988 *Biotechnology* **103**, 3597-3614
- 989 59. Ortega Ugalde, S., Wallraven, K., Speer, A., Bitter, W., Grossmann, T. N., and Commandeur, J. N.  
990 M. (2020) Acetylene containing cyclo(L-Tyr-L-Tyr)-analogs as mechanism-based inhibitors of  
991 CYP121A1 from *Mycobacterium tuberculosis*. *Biochem Pharmacol* **177**, 113938
- 992 60. Magill, S. S., Edwards, J. R., Bamberg, W., Beldavs, Z. G., Dumyati, G., Kainer, M. A., Lynfield, R.,  
993 Maloney, M., McAllister-Hollod, L., Nadle, J., Ray, S. M., Thompson, D. L., Wilson, L. E., and  
994 Fridkin, S. K. (2014) Multistate point-prevalence survey of health care-associated infections. *N*  
995 *Engl J Med* **370**, 1198-1208
- 996 61. Weiner, L. M., Webb, A. K., Limbago, B., Dudeck, M. A., Patel, J., Kallen, A. J., Edwards, J. R., and  
997 Sievert, D. M. (2016) Antimicrobial-Resistant Pathogens Associated With Healthcare-Associated  
998 Infections: Summary of Data Reported to the National Healthcare Safety Network at the Centers  
999 for Disease Control and Prevention, 2011-2014. *Infect Control Hosp Epidemiol* **37**, 1288-1301
- 1000 62. Gaynes, R., and Edwards, J. R. (2005) Overview of nosocomial infections caused by gram-  
1001 negative bacilli. *Clin Infect Dis* **41**, 848-854
- 1002 63. Sadikot, R. T., Blackwell, T. S., Christman, J. W., and Prince, A. S. (2005) Pathogen-host  
1003 interactions in *Pseudomonas aeruginosa* pneumonia. *Am J Respir Crit Care Med* **171**, 1209-1223
- 1004 64. Faure, E., Kwong, K., and Nguyen, D. (2018) *Pseudomonas aeruginosa* in Chronic Lung Infections:  
1005 How to Adapt Within the Host? *Front Immunol* **9**, 2416

- 1006 65. Hoiby, N., Ciofu, O., and Bjarnsholt, T. (2010) *Pseudomonas aeruginosa* biofilms in cystic fibrosis.  
1007 *Future Microbiol* **5**, 1663-1674
- 1008 66. Montero, M., Sala, M., Riu, M., Belvis, F., Salvado, M., Grau, S., Horcajada, J. P., Alvarez-Lerma,  
1009 F., Terradas, R., Orozco-Levi, M., Castells, X., and Knobel, H. (2010) Risk factors for multidrug-  
1010 resistant *Pseudomonas aeruginosa* acquisition. Impact of antibiotic use in a double case-control  
1011 study. *Eur J Clin Microbiol Infect Dis* **29**, 335-339
- 1012 67. McLean, K. J., Marshall, K. R., Richmond, A., Hunter, I. S., Fowler, K., Kieser, T., Gurcha, S. S.,  
1013 Besra, G. S., and Munro, A. W. (2002) Azole antifungals are potent inhibitors of cytochrome  
1014 P450 mono-oxygenases and bacterial growth in mycobacteria and streptomycetes. *Microbiology*  
1015 (*Reading*) **148**, 2937-2949
- 1016 68. Montellano, P. R. O. d. (2015) *Cytochrome P450: Structure, Mechanism, and Biochemistry*, 4 ed.,  
1017 Springer International Publishing, Switzerland
- 1018 69. Ekroos, M., and Sjogren, T. (2006) Structural basis for ligand promiscuity in cytochrome P450  
1019 3A4. *Proc Natl Acad Sci U S A* **103**, 13682-13687
- 1020 70. McLean, K. J., Clift, D., Lewis, D. G., Sabri, M., Balding, P. R., Sutcliffe, M. J., Leys, D., and Munro,  
1021 A. W. (2006) The preponderance of P450s in the *Mycobacterium tuberculosis* genome. *Trends*  
1022 *Microbiol* **14**, 220-228
- 1023 71. Belin, P., Le Du, M. H., Fielding, A., Lequin, O., Jacquet, M., Charbonnier, J. B., Lecoq, A., Thai, R.,  
1024 Courçon, M., Masson, C., Dugave, C., Genet, R., Pernodet, J. L., and Gondry, M. (2009)  
1025 Identification and structural basis of the reaction catalyzed by CYP121, an essential cytochrome  
1026 P450 in *Mycobacterium tuberculosis*. *Proc Natl Acad Sci U S A* **106**, 7426-7431
- 1027 72. McLean, K. J., Carroll, P., Lewis, D. G., Dunford, A. J., Seward, H. E., Neeli, R., Cheesman, M. R.,  
1028 Marsollier, L., Douglas, P., Smith, W. E., Rosenkrands, I., Cole, S. T., Leys, D., Parish, T., and  
1029 Munro, A. W. (2008) Characterization of active site structure in CYP121. A cytochrome P450  
1030 essential for viability of *Mycobacterium tuberculosis* H37Rv. *J Biol Chem* **283**, 33406-33416
- 1031 73. Capyk, J. K., Kalscheuer, R., Stewart, G. R., Liu, J., Kwon, H., Zhao, R., Okamoto, S., Jacobs, W. R.,  
1032 Jr., Eltis, L. D., and Mohn, W. W. (2009) Mycobacterial cytochrome p450 125 (*cyp125*) catalyzes  
1033 the terminal hydroxylation of c27 steroids. *J Biol Chem* **284**, 35534-35542
- 1034 74. Driscoll, M. D., McLean, K. J., Levy, C., Mast, N., Pikuleva, I. A., Lafite, P., Rigby, S. E., Leys, D., and  
1035 Munro, A. W. (2010) Structural and biochemical characterization of *Mycobacterium tuberculosis*  
1036 CYP142: evidence for multiple cholesterol 27-hydroxylase activities in a human pathogen. *J Biol*  
1037 *Chem* **285**, 38270-38282
- 1038 75. Child, S. A., Ghith, A., Bruning, J. B., and Bell, S. G. (2020) A comparison of steroid and lipid  
1039 binding cytochrome P450s from *Mycobacterium marinum* and *Mycobacterium tuberculosis*. *J*  
1040 *Inorg Biochem* **209**, 111116
- 1041 76. Neeli, R., Girvan, H. M., Lawrence, A., Warren, M. J., Leys, D., Scrutton, N. S., and Munro, A. W.  
1042 (2005) The dimeric form of flavocytochrome P450 BM3 is catalytically functional as a fatty acid  
1043 hydroxylase. *FEBS Lett* **579**, 5582-5588
- 1044 77. Koo, L. S., Immoos, C. E., Cohen, M. S., Farmer, P. J., and Ortiz de Montellano, P. R. (2002)  
1045 Enhanced electron transfer and lauric acid hydroxylation by site-directed mutagenesis of  
1046 CYP119. *J Am Chem Soc* **124**, 5684-5691
- 1047 78. Williams, P. A., Cosme, J., Vinkovic, D. M., Ward, A., Angove, H. C., Day, P. J., Vonrhein, C., Tickle,  
1048 I. J., and Jhoti, H. (2004) Crystal structures of human cytochrome P450 3A4 bound to  
1049 metyrapone and progesterone. *Science* **305**, 683-686
- 1050 79. Roberts, A. G., Katayama, J., Kaspera, R., Ledwitch, K. V., Le Trong, I., Stenkamp, R. E.,  
1051 Thompson, J. A., and Totah, R. A. (2016) The role of cytochrome P450 BM3 phenylalanine-87  
1052 and threonine-268 in binding organic hydroperoxides. *Biochim Biophys Acta* **1860**, 669-677

- 1053 80. Ranasinghe, C., and Hobbs, A. A. (1998) Isolation and characterization of two cytochrome P450  
1054 cDNA clones for CYP6B6 and CYP6B7 from *Helicoverpa armigera* (Hubner): possible involvement  
1055 of CYP6B7 in pyrethroid resistance. *Insect Biochem Mol Biol* **28**, 571-580
- 1056 81. Qhanya, L. B., Matowane, G., Chen, W., Sun, Y., Letsimo, E. M., Parvez, M., Yu, J.-H., Mashele, S.  
1057 S., and Syed, K. (2015) Genome-Wide Annotation and Comparative Analysis of Cytochrome P450  
1058 Monooxygenases in Basidiomycete Biotrophic Plant Pathogens. *PLoS one* **10**, e0142100-  
1059 e0142100
- 1060 82. Follmer, A. H., Mahomed, M., Goodin, D. B., and Poulos, T. L. (2018) Substrate-Dependent  
1061 Allosteric Regulation in Cytochrome P450cam (CYP101A1). *J Am Chem Soc* **140**, 16222-16228
- 1062 83. van Vugt-Lussenburg, B. M., Damsten, M. C., Maasdijk, D. M., Vermeulen, N. P., and  
1063 Commandeur, J. N. (2006) Heterotropic and homotropic cooperativity by a drug-metabolising  
1064 mutant of cytochrome P450 BM3. *Biochem Biophys Res Commun* **346**, 810-818
- 1065 84. Roberts, A. G., Yang, J., Halpert, J. R., Nelson, S. D., Thummel, K. T., and Atkins, W. M. (2011) The  
1066 structural basis for homotropic and heterotropic cooperativity of midazolam metabolism by  
1067 human cytochrome P450 3A4. *Biochemistry* **50**, 10804-10818
- 1068 85. Yamazaki, H., Suemizu, H., Murayama, N., Utoh, M., Shibata, N., Nakamura, M., and Guengerich,  
1069 F. P. (2013) In vivo drug interactions of the teratogen thalidomide with midazolam: heterotropic  
1070 cooperativity of human cytochrome P450 in humanized TK-NOG mice. *Chem Res Toxicol* **26**, 486-  
1071 489
- 1072 86. Li, J., Chen, Y., Tang, Y., Li, W., and Tu, Y. (2021) Homotropic Cooperativity of Midazolam  
1073 Metabolism by Cytochrome P450 3A4: Insight from Computational Studies. *J Chem Inf Model* **61**,  
1074 2418-2426
- 1075 87. Zurier, R. B. (1993) Fatty acids, inflammation and immune responses. *Prostaglandins Leukot*  
1076 *Essent Fatty Acids* **48**, 57-62
- 1077 88. Yoshino, M., and Murakami, K. (2015) Analysis of the substrate inhibition of complete and  
1078 partial types. *Springerplus* **4**, 292
- 1079 89. Reed, M. C., Lieb, A., and Nijhout, H. F. (2010) The biological significance of substrate inhibition:  
1080 a mechanism with diverse functions. *Bioessays* **32**, 422-429
- 1081 90. Wu, B. (2011) Substrate inhibition kinetics in drug metabolism reactions. *Drug Metab Rev* **43**,  
1082 440-456
- 1083 91. Levistre, R., Lemnaouar, M., Rybkine, T., Béréziat, G., and Masliah, J. (1993) Increase of  
1084 bradykinin-stimulated arachidonic acid release in a delta F508 cystic fibrosis epithelial cell line.  
1085 *Biochim Biophys Acta* **1181**, 233-239
- 1086 92. Rao, J., DiGiandomenico, A., Artamonov, M., Leitinger, N., Amin, A. R., and Goldberg, J. B. (2011)  
1087 Host derived inflammatory phospholipids regulate rahU (PA0122) gene, protein, and biofilm  
1088 formation in *Pseudomonas aeruginosa*. *Cell Immunol* **270**, 95-102
- 1089 93. Baker, L. Y., Hobby, C. R., Siv, A. W., Bible, W. C., Glennon, M. S., Anderson, D. M., Symes, S. J.,  
1090 and Giles, D. K. (2018) *Pseudomonas aeruginosa* responds to exogenous polyunsaturated fatty  
1091 acids (PUFAs) by modifying phospholipid composition, membrane permeability, and phenotypes  
1092 associated with virulence. *BMC Microbiol* **18**, 117
- 1093 94. Yaghi, A., Webb, C. D., Scott, J. A., Mehta, S., Bend, J. R., and McCormack, D. G. (2001)  
1094 Cytochrome P450 metabolites of arachidonic acid but not cyclooxygenase-2 metabolites  
1095 contribute to the pulmonary vascular hyporeactivity in rats with acute *Pseudomonas*  
1096 pneumonia. *J Pharmacol Exp Ther* **297**, 479-488
- 1097 95. Auvin, S., Collet, F., Gottrand, F., Husson, M. O., Leroy, X., Beermann, C., and Guery, B. P. (2005)  
1098 Long-chain polyunsaturated fatty acids modulate lung inflammatory response induced by  
1099 *Pseudomonas aeruginosa* in mice. *Pediatr Res* **58**, 211-215

- 1100 96. Kroetz, D. L., and Zeldin, D. C. (2002) Cytochrome P450 pathways of arachidonic acid  
1101 metabolism. *Curr Opin Lipidol* **13**, 273-283
- 1102 97. Fleming, I. (2001) Cytochrome p450 and vascular homeostasis. *Circ Res* **89**, 753-762
- 1103 98. Carroll, M. A., Balazy, M., Huang, D. D., Rybalova, S., Falck, J. R., and McGiff, J. C. (1997)  
1104 Cytochrome P450-derived renal HETEs: storage and release. *Kidney Int* **51**, 1696-1702
- 1105 99. Laethem, R. M., Balazy, M., Falck, J. R., Laethem, C. L., and Koop, D. R. (1993) Formation of 19(S)-  
1106 , 19(R)-, and 18(R)-hydroxyeicosatetraenoic acids by alcohol-inducible cytochrome P450 2E1. *J*  
1107 *Biol Chem* **268**, 12912-12918
- 1108 100. Qu, W., Bradbury, J. A., Tsao, C. C., Maronpot, R., Harry, G. J., Parker, C. E., Davis, L. S., Breyer,  
1109 M. D., Waalkes, M. P., Falck, J. R., Chen, J., Rosenberg, R. L., and Zeldin, D. C. (2001) Cytochrome  
1110 P450 CYP2J9, a new mouse arachidonic acid omega-1 hydroxylase predominantly expressed in  
1111 brain. *J Biol Chem* **276**, 25467-25479
- 1112 101. Chuang, S. S., Helvig, C., Taimi, M., Ramshaw, H. A., Collop, A. H., Amad, M., White, J. A.,  
1113 Petkovich, M., Jones, G., and Korczak, B. (2004) CYP2U1, a novel human thymus- and brain-  
1114 specific cytochrome P450, catalyzes omega- and (omega-1)-hydroxylation of fatty acids. *J Biol*  
1115 *Chem* **279**, 6305-6314
- 1116 102. Escalante, B., Falck, J. R., Yadagiri, P., Sun, L. M., and Laniado-Schwartzman, M. (1988) 19(S)-  
1117 hydroxyeicosatetraenoic acid is a potent stimulator of renal Na<sup>+</sup>-K<sup>+</sup>-ATPase. *Biochem Biophys*  
1118 *Res Commun* **152**, 1269-1274
- 1119 103. Carroll, M. A., Balazy, M., Margiotta, P., Huang, D. D., Falck, J. R., and McGiff, J. C. (1996)  
1120 Cytochrome P-450-dependent HETEs: profile of biological activity and stimulation by vasoactive  
1121 peptides. *Am J Physiol* **271**, R863-869
- 1122 104. Tunaru, S., Chennupati, R., Nüsing, R. M., and Offermanns, S. (2016) Arachidonic Acid Metabolite  
1123 19(S)-HETE Induces Vasorelaxation and Platelet Inhibition by Activating Prostacyclin (IP)  
1124 Receptor. *PLoS One* **11**, e0163633
- 1125 105. Ishizuka, T., Cheng, J., Singh, H., Vitto, M. D., Manthati, V. L., Falck, J. R., and Laniado-  
1126 Schwartzman, M. (2008) 20-Hydroxyeicosatetraenoic acid stimulates nuclear factor-kappaB  
1127 activation and the production of inflammatory cytokines in human endothelial cells. *J Pharmacol*  
1128 *Exp Ther* **324**, 103-110
- 1129 106. Shoieb, S. M., El-Sherbeni, A. A., and El-Kadi, A. O. S. (2019) Subterminal  
1130 hydroxyeicosatetraenoic acids: Crucial lipid mediators in normal physiology and disease states.  
1131 *Chem Biol Interact* **299**, 140-150
- 1132 107. Wilson, M. G., and Pandey, S. (2021) *Pseudomonas Aeruginosa*. in *StatPearls*, StatPearls  
1133 Publishing
- 1134 Copyright © 2021, StatPearls Publishing LLC., Treasure Island (FL). pp
- 1135 108. Winstanley, C., O'Brien, S., and Brockhurst, M. A. (2016) *Pseudomonas aeruginosa* Evolutionary  
1136 Adaptation and Diversification in Cystic Fibrosis Chronic Lung Infections. *Trends in microbiology*  
1137 **24**, 327-337
- 1138 109. Berry, S. B., Haack, A. J., Theberge, A. B., Brighenti, S., and Svensson, M. (2020) Host and  
1139 Pathogen Communication in the Respiratory Tract: Mechanisms and Models of a Complex  
1140 Signaling Microenvironment. *Frontiers in Medicine* **7**
- 1141 110. White, J. R., Dauros-Singorenko, P., Hong, J., Vanholsbeeck, F., Phillips, A., and Swift, S. (2020)  
1142 The role of host molecules in communication with the resident and pathogenic microbiota: A  
1143 review. *Medicine in Microecology* **4**, 100005
- 1144 111. Winsor, G. L., Van Rossum, T., Lo, R., Khaira, B., Whiteside, M. D., Hancock, R. E., and Brinkman,  
1145 F. S. (2009) *Pseudomonas* Genome Database: facilitating user-friendly, comprehensive  
1146 comparisons of microbial genomes. *Nucleic Acids Res* **37**, D483-488

- 1147 112. Stothard, P. (2000) The sequence manipulation suite: JavaScript programs for analyzing and  
1148 formatting protein and DNA sequences. *Biotechniques* **28**, 1102, 1104
- 1149 113. Barnes, H. J., Arlotto, M. P., and Waterman, M. R. (1991) Expression and enzymatic activity of  
1150 recombinant cytochrome P450 17 alpha-hydroxylase in Escherichia coli. *Proc Natl Acad Sci U S A*  
1151 **88**, 5597-5601
- 1152 114. Omura, T., and Sato, R. (1964) The Carbon Monoxide-Binding Pigment of Liver Microsomes. I.  
1153 Evidence for Its Hemoprotein Nature. *J Biol Chem* **239**, 2370-2378
- 1154 115. Technology, N. I. o. S. a. (2014) NIH Mass Spectral Library with Search Program (Data Verison:  
1155 NIST 14, Software Version 2.2).
- 1156 116. McDonald, M. G., Ray, S., Amorosi, C. J., Sitko, K. A., Kowalski, J. P., Paco, L., Nath, A., Gallis, B.,  
1157 Totah, R. A., Dunham, M. J., Fowler, D. M., and Rettie, A. E. (2017) Expression and Functional  
1158 Characterization of Breast Cancer-Associated Cytochrome P450 4Z1 in Saccharomyces  
1159 cerevisiae. *Drug Metab Dispos* **45**, 1364-1371
- 1160 117. Pettersen, E. F., Goddard, T. D., Huang, C. C., Couch, G. S., Greenblatt, D. M., Meng, E. C., and  
1161 Ferrin, T. E. (2004) UCSF Chimera--a visualization system for exploratory research and analysis. *J*  
1162 *Comput Chem* **25**, 1605-1612
- 1163
